# Supplementary material for: Effects of shinbuto and ninjinto on prostaglandin E 2 production in lipopolysaccharide-treated human gingival fibroblasts
Source: PeerJ journal article supplement (doi:10.7717/peerj.4120), 2017-12-01
Supplement: raw_data_Fig1_2_3_6.zip [file raw_data_Fig1_2_3_6.zip]

- Exp. 6
- Condition
  - drug1: PgLPS (pg/ml)
  - drug2: TJ041 (mg/ml)
  - experimental No. 1
  - treatment: 24h
- Measurement
  - IL-8
  - Date: 2012.11.5
- Cells
  - cells: HGFs (No. 1), passages: 15
  - cell numbers:  $1 \times 10^4$  cells/well =  $5 \times 10^4$  cells/ml

|   | conc.  | OD    | OD-blank |
|---|--------|-------|----------|
| 1 | 0.0    | 0.073 | 0.000    |
| 2 | 15.6   | 0.122 | 0.049    |
| 3 | 31.2   | 0.154 | 0.081    |
| 4 | 62.5   | 0.227 | 0.154    |
| 5 | 125.0  | 0.347 | 0.274    |
| 6 | 250.0  | 0.571 | 0.498    |
| 7 | 500.0  | 0.875 | 0.802    |
| 8 | 1000.0 | 1.179 | 1.106    |

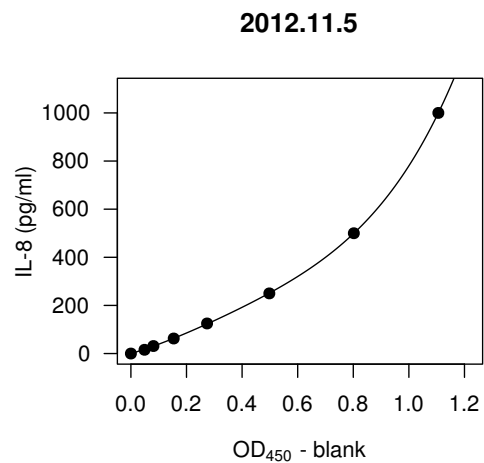

|   | drug1 | drug2 | mean  | SD    |
|---|-------|-------|-------|-------|
| 1 | 0     | 0.000 | 0.060 | 0.028 |
| 2 | 0     | 0.010 | 0.049 | 0.019 |
| 3 | 0     | 0.100 | 0.049 | 0.029 |
| 4 | 0     | 1.000 | 0.046 | 0.012 |
| 5 | 10    | 0.000 | 2.837 | 0.412 |
| 6 | 10    | 0.010 | 3.054 | 0.296 |
| 7 | 10    | 0.100 | 3.379 | 0.238 |
| 8 | 10    | 1.000 | 3.603 | 0.203 |

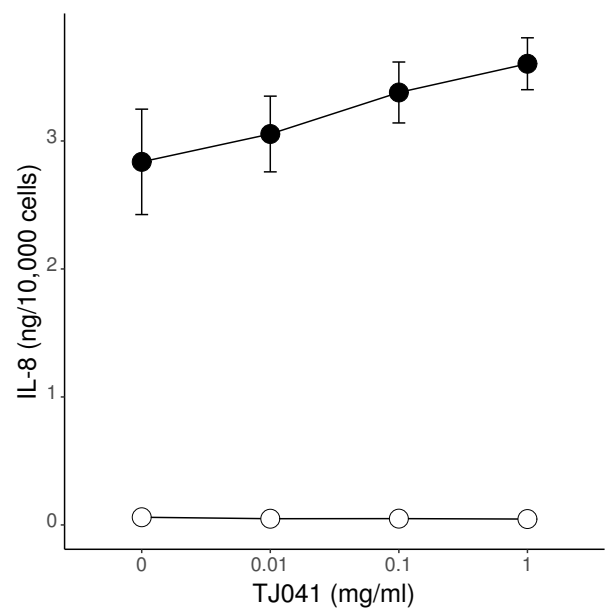

|    | drug1 | drug2 | viability | dilution | OD    | conc. (pg/ml) | net (ng/ml) | (ng/10,000 cells) |
|----|-------|-------|-----------|----------|-------|---------------|-------------|-------------------|
| 1  | 0     | 0.000 | 102.68    | 50       | 0.093 | 6.98          | 0.349       | 0.068             |
| 2  | 0     | 0.000 | 96.30     | 50       | 0.081 | 2.74          | 0.137       | 0.028             |
| 3  | 0     | 0.000 | 101.01    | 50       | 0.097 | 8.43          | 0.422       | 0.084             |
| 4  | 0     | 0.010 | 99.49     | 50       | 0.085 | 4.14          | 0.207       | 0.042             |
| 5  | 0     | 0.010 | 94.94     | 50       | 0.092 | 6.62          | 0.331       | 0.070             |
| 6  | 0     | 0.010 | 99.65     | 50       | 0.083 | 3.44          | 0.172       | 0.034             |
| 7  | 0     | 0.100 | 102.83    | 50       | 0.079 | 2.05          | 0.102       | 0.020             |
| 8  | 0     | 0.100 | 95.85     | 50       | 0.087 | 4.84          | 0.242       | 0.051             |
| 9  | 0     | 0.100 | 99.49     | 50       | 0.095 | 7.71          | 0.385       | 0.077             |
| 10 | 0     | 1.000 | 101.47    | 50       | 0.090 | 5.91          | 0.295       | 0.058             |
| 11 | 0     | 1.000 | 97.37     | 50       | 0.086 | 4.49          | 0.224       | 0.046             |
| 12 | 0     | 1.000 | 102.08    | 50       | 0.083 | 3.44          | 0.172       | 0.034             |
| 13 | 10    | 0.000 | 101.92    | 50       | 0.616 | 280.44        | 14.022      | 2.752             |
| 14 | 10    | 0.000 | 102.53    | 50       | 0.575 | 253.70        | 12.685      | 2.474             |
| 15 | 10    | 0.000 | 99.95     | 50       | 0.684 | 328.28        | 16.414      | 3.284             |
| 16 | 10    | 0.010 | 100.40    | 50       | 0.611 | 277.10        | 13.855      | 2.760             |
| 17 | 10    | 0.010 | 102.08    | 50       | 0.661 | 311.54        | 15.577      | 3.052             |
| 18 | 10    | 0.010 | 100.86    | 50       | 0.697 | 338.03        | 16.901      | 3.351             |
| 19 | 10    | 0.100 | 100.71    | 50       | 0.671 | 318.74        | 15.937      | 3.165             |
| 20 | 10    | 0.100 | 104.35    | 50       | 0.749 | 379.34        | 18.967      | 3.635             |
| 21 | 10    | 0.100 | 101.77    | 50       | 0.699 | 339.55        | 16.977      | 3.336             |
| 22 | 10    | 1.000 | 100.71    | 50       | 0.709 | 347.22        | 17.361      | 3.448             |
| 23 | 10    | 1.000 | 103.75    | 50       | 0.733 | 366.20        | 18.310      | 3.530             |
| 24 | 10    | 1.000 | 101.62    | 50       | 0.761 | 389.47        | 19.473      | 3.833             |
