# Supplementary material for: Effects of shinbuto and ninjinto on prostaglandin E 2 production in lipopolysaccharide-treated human gingival fibroblasts
Source: PeerJ journal article supplement (doi:10.7717/peerj.4120), 2017-12-01
Supplement: raw_data_Fig1_2_3_6.zip [file raw_data_Fig1_2_3_6.zip]

|    | drug  | LPS | dose   | mean   | sd   |
|----|-------|-----|--------|--------|------|
| 1  | TJ030 | 0   | 0.000  | 100.00 | 6.19 |
| 2  | TJ030 | 0   | 0.500  | 97.72  | 8.39 |
| 3  | TJ030 | 0   | 1.000  | 98.92  | 9.06 |
| 4  | TJ030 | 0   | 2.000  | 96.18  | 3.72 |
| 5  | TJ030 | 0   | 5.000  | 81.87  | 4.05 |
| 6  | TJ030 | 0   | 10.000 | 60.04  | 1.75 |
| 7  | TJ030 | 10  | 0.000  | 100.88 | 2.81 |
| 8  | TJ030 | 10  | 0.500  | 105.05 | 6.54 |
| 9  | TJ030 | 10  | 1.000  | 107.04 | 3.88 |
| 10 | TJ030 | 10  | 2.000  | 99.21  | 8.20 |
| 11 | TJ030 | 10  | 5.000  | 91.30  | 7.38 |
| 12 | TJ030 | 10  | 10.000 | 68.09  | 3.12 |

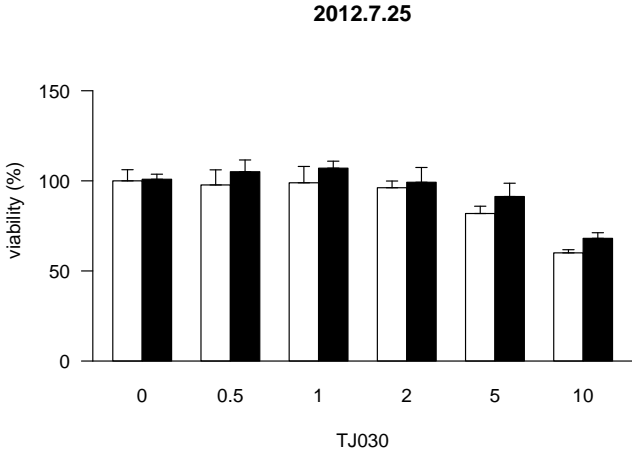

- cells: HGFs (No. 2)
- passages: 8
- cell numbers:  $0.5 \times 10^4$  cells/well
- LPS: PgLPS (10 ng/ml), treatment: 24h

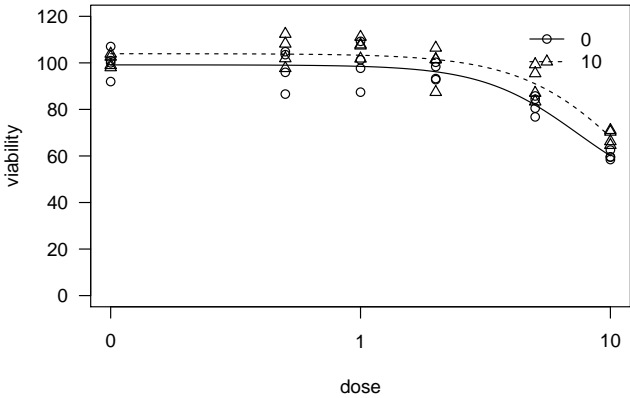

|       | Estimate | Std. Error | Lower  | Upper |
|-------|----------|------------|--------|-------|
| 0:50  | 7.40     | 6.25       | -5.23  | 20.04 |
| 10:50 | 13.13    | 25.90      | -39.21 | 65.47 |

|   | drug  | OD    | mean  |
|---|-------|-------|-------|
| 1 | blank | 0.083 | 0.082 |
| 2 | blank | 0.077 |       |
| 3 | blank | 0.082 |       |
| 4 | blank | 0.081 |       |
| 5 | blank | 0.083 |       |
| 6 | blank | 0.083 |       |
| 7 | blank | 0.101 |       |
| 8 | blank | 0.069 |       |

|    | drug  | LPS | dose   | OD    | viability |
|----|-------|-----|--------|-------|-----------|
| 1  | TJ030 | 0   | 0.000  | 0.788 | 92.0      |
| 2  | TJ030 | 0   | 0.000  | 0.857 | 100.0     |
| 3  | TJ030 | 0   | 0.000  | 0.865 | 101.0     |
| 4  | TJ030 | 0   | 0.000  | 0.917 | 107.0     |
| 5  | TJ030 | 0   | 0.500  | 0.742 | 86.6      |
| 6  | TJ030 | 0   | 0.500  | 0.887 | 103.5     |
| 7  | TJ030 | 0   | 0.500  | 0.822 | 95.9      |
| 8  | TJ030 | 0   | 0.500  | 0.898 | 104.8     |
| 9  | TJ030 | 0   | 1.000  | 0.749 | 87.4      |
| 10 | TJ030 | 0   | 1.000  | 0.868 | 101.3     |
| 11 | TJ030 | 0   | 1.000  | 0.837 | 97.7      |
| 12 | TJ030 | 0   | 1.000  | 0.936 | 109.3     |
| 13 | TJ030 | 0   | 2.000  | 0.795 | 92.8      |
| 14 | TJ030 | 0   | 2.000  | 0.843 | 98.4      |
| 15 | TJ030 | 0   | 2.000  | 0.859 | 100.3     |
| 16 | TJ030 | 0   | 2.000  | 0.799 | 93.3      |
| 17 | TJ030 | 0   | 5.000  | 0.658 | 76.8      |
| 18 | TJ030 | 0   | 5.000  | 0.690 | 80.5      |
| 19 | TJ030 | 0   | 5.000  | 0.723 | 84.4      |
| 20 | TJ030 | 0   | 5.000  | 0.735 | 85.8      |
| 21 | TJ030 | 0   | 10.000 | 0.536 | 62.5      |
| 22 | TJ030 | 0   | 10.000 | 0.511 | 59.6      |
| 23 | TJ030 | 0   | 10.000 | 0.501 | 58.5      |
| 24 | TJ030 | 0   | 10.000 | 0.510 | 59.5      |
| 25 | TJ030 | 10  | 0.000  | 0.879 | 102.6     |
| 26 | TJ030 | 10  | 0.000  | 0.890 | 103.9     |
| 27 | TJ030 | 10  | 0.000  | 0.848 | 99.0      |
| 28 | TJ030 | 10  | 0.000  | 0.840 | 98.0      |
| 29 | TJ030 | 10  | 0.500  | 0.873 | 101.9     |
| 30 | TJ030 | 10  | 0.500  | 0.963 | 112.4     |
| 31 | TJ030 | 10  | 0.500  | 0.927 | 108.2     |
| 32 | TJ030 | 10  | 0.500  | 0.837 | 97.7      |
| 33 | TJ030 | 10  | 1.000  | 0.924 | 107.9     |
| 34 | TJ030 | 10  | 1.000  | 0.920 | 107.4     |
| 35 | TJ030 | 10  | 1.000  | 0.952 | 111.1     |
| 36 | TJ030 | 10  | 1.000  | 0.872 | 101.8     |
| 37 | TJ030 | 10  | 2.000  | 0.870 | 101.5     |
| 38 | TJ030 | 10  | 2.000  | 0.869 | 101.4     |
| 39 | TJ030 | 10  | 2.000  | 0.912 | 106.5     |
| 40 | TJ030 | 10  | 2.000  | 0.749 | 87.4      |
| 41 | TJ030 | 10  | 5.000  | 0.818 | 95.5      |
| 42 | TJ030 | 10  | 5.000  | 0.746 | 87.1      |
| 43 | TJ030 | 10  | 5.000  | 0.851 | 99.3      |
| 44 | TJ030 | 10  | 5.000  | 0.714 | 83.3      |
| 45 | TJ030 | 10  | 10.000 | 0.603 | 70.4      |
| 46 | TJ030 | 10  | 10.000 | 0.554 | 64.6      |
| 47 | TJ030 | 10  | 10.000 | 0.609 | 71.1      |
| 48 | TJ030 | 10  | 10.000 | 0.568 | 66.3      |
