# Supplementary material for: Effects of shinbuto and ninjinto on prostaglandin E 2 production in lipopolysaccharide-treated human gingival fibroblasts
Source: PeerJ journal article supplement (doi:10.7717/peerj.4120), 2017-12-01
Supplement: raw_data_Fig1_2_3_6.zip [file raw_data_Fig1_2_3_6.zip]

- Exp. 6
- Condition
  - drug1: PgLPS (pg/ml)
  - drug2: TJ029 (mg/ml)
  - experimental No. 1
  - treatment: 24h
- Measurement
  - WST-8
  - Date: 2012.7.5
- Cells
  - cells: HGFs (No. 1), passages: 15
  - cell numbers:  $1 \times 10^4$  cells/well

|   | drug1 | drug2 | mean  | SD  |
|---|-------|-------|-------|-----|
| 1 | 0     | 0.000 | 100.0 | 4.1 |
| 2 | 0     | 0.010 | 100.0 | 3.8 |
| 3 | 0     | 0.100 | 99.5  | 4.2 |
| 4 | 0     | 1.000 | 99.4  | 2.5 |
| 5 | 10    | 0.000 | 100.3 | 1.0 |
| 6 | 10    | 0.010 | 98.9  | 0.8 |
| 7 | 10    | 0.100 | 99.9  | 1.4 |
| 8 | 10    | 1.000 | 100.5 | 1.6 |

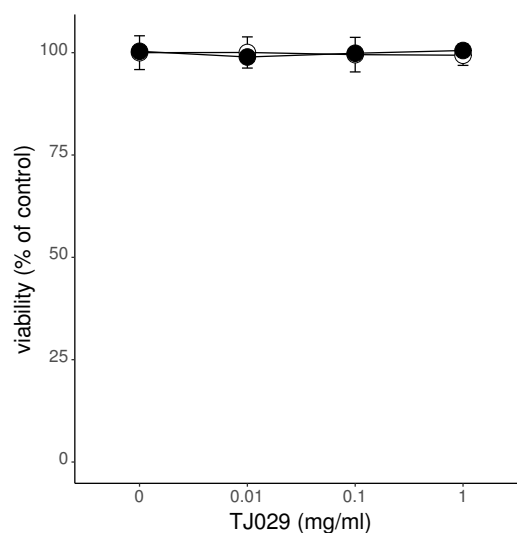

|   | OD    | mean  |
|---|-------|-------|
| 1 | 0.049 | 0.052 |
| 2 | 0.055 |       |
| 3 | 0.051 |       |
| 4 | 0.054 |       |
| 5 | 0.064 |       |
| 6 | 0.062 |       |
| 7 | 0.059 |       |
| 8 | 0.026 |       |

|    | drug1 | drug2 | OD    | OD-blank | viability |
|----|-------|-------|-------|----------|-----------|
| 1  | 0     | 0.000 | 0.773 | 0.721    | 103.9     |
| 2  | 0     | 0.000 | 0.716 | 0.663    | 95.7      |
| 3  | 0     | 0.000 | 0.749 | 0.697    | 100.4     |
| 4  | 0     | 0.010 | 0.775 | 0.723    | 104.2     |
| 5  | 0     | 0.010 | 0.723 | 0.670    | 96.7      |
| 6  | 0     | 0.010 | 0.741 | 0.689    | 99.3      |
| 7  | 0     | 0.100 | 0.774 | 0.722    | 104.0     |
| 8  | 0     | 0.100 | 0.716 | 0.663    | 95.7      |
| 9  | 0     | 0.100 | 0.738 | 0.685    | 98.8      |
| 10 | 0     | 1.000 | 0.754 | 0.702    | 101.2     |
| 11 | 0     | 1.000 | 0.722 | 0.669    | 96.5      |
| 12 | 0     | 1.000 | 0.749 | 0.697    | 100.4     |
| 13 | 10    | 0.000 | 0.747 | 0.695    | 100.1     |
| 14 | 10    | 0.000 | 0.756 | 0.704    | 101.4     |
| 15 | 10    | 0.000 | 0.742 | 0.690    | 99.4      |
| 16 | 10    | 0.010 | 0.733 | 0.680    | 98.1      |
| 17 | 10    | 0.010 | 0.744 | 0.692    | 99.7      |
| 18 | 10    | 0.010 | 0.739 | 0.686    | 99.0      |
| 19 | 10    | 0.100 | 0.748 | 0.696    | 100.3     |
| 20 | 10    | 0.100 | 0.753 | 0.701    | 101.0     |
| 21 | 10    | 0.100 | 0.734 | 0.681    | 98.3      |
| 22 | 10    | 1.000 | 0.739 | 0.686    | 99.0      |
| 23 | 10    | 1.000 | 0.761 | 0.709    | 102.2     |
| 24 | 10    | 1.000 | 0.749 | 0.697    | 100.4     |
