# Supplementary material for: Effects of shinbuto and ninjinto on prostaglandin E 2 production in lipopolysaccharide-treated human gingival fibroblasts
Source: PeerJ journal article supplement (doi:10.7717/peerj.4120), 2017-12-01
Supplement: raw_data_Fig1_2_3_6.zip [file raw_data_Fig1_2_3_6.zip]

- Exp. 25
- Condition
  - drug1: kankyo (ug/ml)
  - experimental No. 2
  - treatment: 24h
- Measurement
  - PGE2
  - Date: 2017.4.11
- Cells
  - cells: HGFs (No. 1), passages: 13
  - cell numbers:  $0.8 \times 10^4$  cells/well =  $4 \times 10^4$  cells/ml

|   | conc.  | OD    |
|---|--------|-------|
| 1 | 7.8    | 1.061 |
| 2 | 15.6   | 0.911 |
| 3 | 31.2   | 0.755 |
| 4 | 62.5   | 0.624 |
| 5 | 125.0  | 0.408 |
| 6 | 250.0  | 0.280 |
| 7 | 500.0  | 0.239 |
| 8 | 1000.0 | 0.205 |

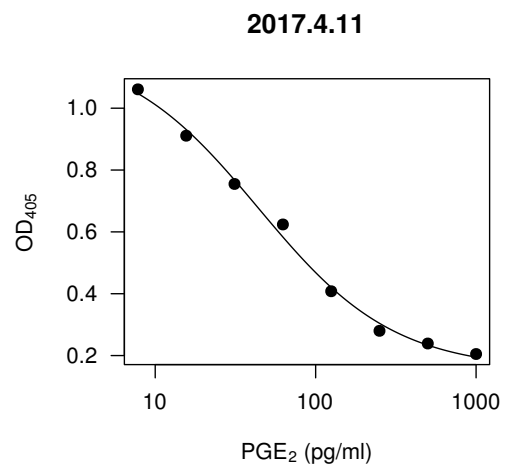

|   | drug1 | mean  | SD    |
|---|-------|-------|-------|
| 1 | 0     | 0.463 | 0.094 |
| 2 | 1     | 0.351 | 0.109 |
| 3 | 10    | 0.170 | 0.084 |
| 4 | 100   | 0.029 | 0.015 |

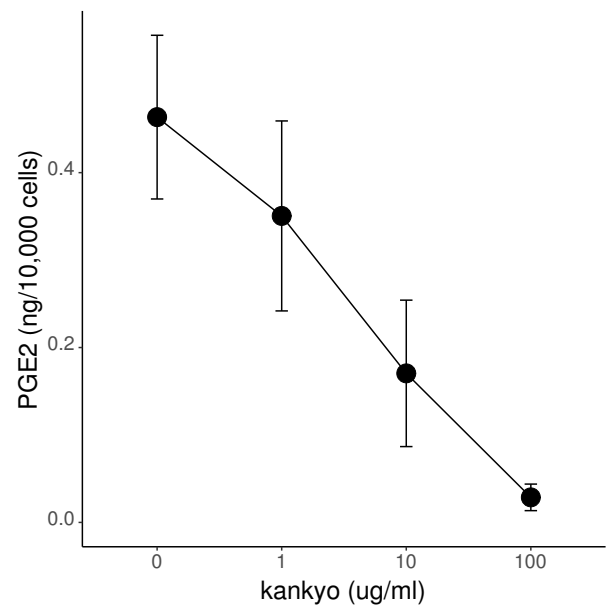

|    | drug1 | viability | dilution | OD    | conc. (pg/ml) | net (ng/ml) | (ng/10,000 cells) |
|----|-------|-----------|----------|-------|---------------|-------------|-------------------|
| 1  | 0     | 105.22    | 25       | 0.568 | 66.32         | 1.658       | 0.394             |
| 2  | 0     | 106.36    | 25       | 0.545 | 72.60         | 1.815       | 0.427             |
| 3  | 0     | 88.43     | 25       | 0.519 | 80.64         | 2.016       | 0.570             |
| 4  | 1     | 105.79    | 25       | 0.611 | 56.24         | 1.406       | 0.332             |
| 5  | 1     | 100.66    | 25       | 0.698 | 40.61         | 1.015       | 0.252             |
| 6  | 1     | 87.71     | 25       | 0.571 | 65.55         | 1.639       | 0.467             |
| 7  | 10    | 99.81     | 25       | 0.685 | 42.63         | 1.066       | 0.267             |
| 8  | 10    | 101.94    | 25       | 0.868 | 20.81         | 0.520       | 0.128             |
| 9  | 10    | 90.13     | 25       | 0.915 | 16.85         | 0.421       | 0.117             |
| 10 | 100   | 106.07    | 25       | 1.106 | 4.54          | 0.114       | 0.027             |
| 11 | 100   | 94.97     | 25       | 1.065 | 6.79          | 0.170       | 0.045             |
| 12 | 100   | 95.54     | 25       | 1.152 | 2.21          | 0.055       | 0.014             |
