# Supplementary material for: Effects of shinbuto and ninjinto on prostaglandin E 2 production in lipopolysaccharide-treated human gingival fibroblasts
Source: PeerJ journal article supplement (doi:10.7717/peerj.4120), 2017-12-01
Supplement: raw_data_Fig1_2_3_6.zip [file raw_data_Fig1_2_3_6.zip]

- Exp. 6
- Condition
  - drug1: PgLPS (pg/ml)
  - drug2: TJ030 (mg/ml)
  - experimental No. 1
  - treatment: 24h
- Measurement
  - IL-8
  - Date: 2012.11.5
- Cells
  - cells: HGFs (No. 1), passages: 15
  - cell numbers:  $1 \times 10^4$  cells/well =  $5 \times 10^4$  cells/ml

|   | conc.  | OD    | OD-blank |
|---|--------|-------|----------|
| 1 | 0.0    | 0.073 | 0.000    |
| 2 | 15.6   | 0.122 | 0.049    |
| 3 | 31.2   | 0.154 | 0.081    |
| 4 | 62.5   | 0.227 | 0.154    |
| 5 | 125.0  | 0.347 | 0.274    |
| 6 | 250.0  | 0.571 | 0.498    |
| 7 | 500.0  | 0.875 | 0.802    |
| 8 | 1000.0 | 1.179 | 1.106    |

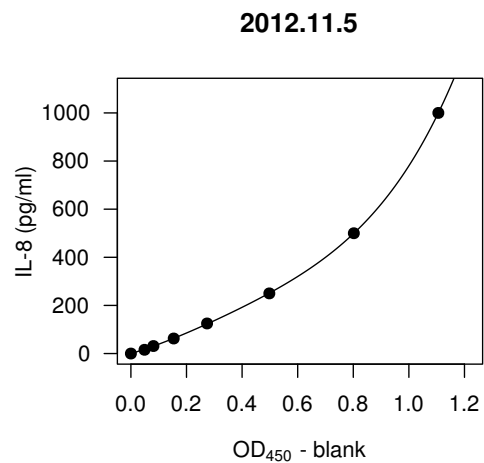

|   | drug1 | drug2 | mean  | SD    |
|---|-------|-------|-------|-------|
| 1 | 0     | 0.000 | 0.003 | 0.004 |
| 2 | 0     | 0.010 | 0.025 | 0.011 |
| 3 | 0     | 0.100 | 0.034 | 0.008 |
| 4 | 0     | 1.000 | 0.064 | 0.004 |
| 5 | 10    | 0.000 | 3.418 | 0.329 |
| 6 | 10    | 0.010 | 3.341 | 0.245 |
| 7 | 10    | 0.100 | 3.120 | 0.312 |
| 8 | 10    | 1.000 | 3.416 | 0.072 |

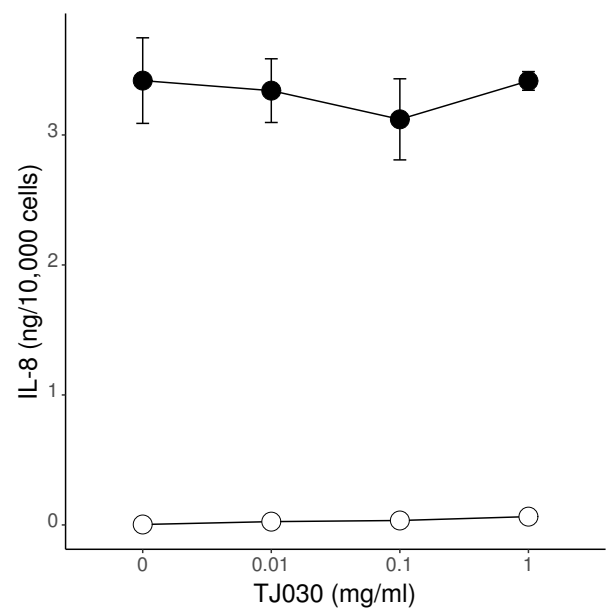

|    | drug1 | drug2 | viability | dilution | OD    | conc. (pg/ml) | net (ng/ml) | (ng/10,000 cells) |
|----|-------|-------|-----------|----------|-------|---------------|-------------|-------------------|
| 1  | 0     | 0.000 | 102.23    | 50       | 0.074 | 0.34          | 0.017       | 0.003             |
| 2  | 0     | 0.000 | 96.79     | 50       | 0.075 | 0.68          | 0.034       | 0.007             |
| 3  | 0     | 0.000 | 100.99    | 50       | 0.073 | 0.00          | 0.000       | 0.000             |
| 4  | 0     | 0.010 | 102.23    | 50       | 0.077 | 1.36          | 0.068       | 0.013             |
| 5  | 0     | 0.010 | 95.23     | 50       | 0.081 | 2.74          | 0.137       | 0.029             |
| 6  | 0     | 0.010 | 100.67    | 50       | 0.083 | 3.44          | 0.172       | 0.034             |
| 7  | 0     | 0.100 | 104.41    | 50       | 0.081 | 2.74          | 0.137       | 0.026             |
| 8  | 0     | 0.100 | 97.56     | 50       | 0.085 | 4.14          | 0.207       | 0.042             |
| 9  | 0     | 0.100 | 101.45    | 50       | 0.083 | 3.44          | 0.172       | 0.034             |
| 10 | 0     | 1.000 | 104.10    | 50       | 0.093 | 6.98          | 0.349       | 0.067             |
| 11 | 0     | 1.000 | 99.27     | 50       | 0.090 | 5.91          | 0.295       | 0.060             |
| 12 | 0     | 1.000 | 101.92    | 50       | 0.092 | 6.62          | 0.331       | 0.065             |
| 13 | 10    | 0.000 | 103.16    | 50       | 0.729 | 362.98        | 18.149      | 3.519             |
| 14 | 10    | 0.000 | 104.25    | 50       | 0.670 | 318.02        | 15.901      | 3.051             |
| 15 | 10    | 0.000 | 102.70    | 50       | 0.748 | 378.51        | 18.925      | 3.686             |
| 16 | 10    | 0.010 | 105.18    | 50       | 0.675 | 321.66        | 16.083      | 3.058             |
| 17 | 10    | 0.010 | 103.01    | 50       | 0.723 | 358.19        | 17.910      | 3.477             |
| 18 | 10    | 0.010 | 103.16    | 50       | 0.725 | 359.78        | 17.989      | 3.488             |
| 19 | 10    | 0.100 | 101.76    | 50       | 0.670 | 318.02        | 15.901      | 3.125             |
| 20 | 10    | 0.100 | 103.32    | 50       | 0.630 | 289.90        | 14.495      | 2.806             |
| 21 | 10    | 0.100 | 101.92    | 50       | 0.712 | 349.55        | 17.477      | 3.430             |
| 22 | 10    | 1.000 | 101.61    | 50       | 0.698 | 338.79        | 16.939      | 3.334             |
| 23 | 10    | 1.000 | 104.25    | 50       | 0.724 | 358.99        | 17.949      | 3.444             |
| 24 | 10    | 1.000 | 103.01    | 50       | 0.722 | 357.40        | 17.870      | 3.470             |
