# Supplementary material for: Effects of shinbuto and ninjinto on prostaglandin E 2 production in lipopolysaccharide-treated human gingival fibroblasts
Source: PeerJ journal article supplement (doi:10.7717/peerj.4120), 2017-12-01
Supplement: raw_data_Fig1_2_3_6.zip [file raw_data_Fig1_2_3_6.zip]

'drc' has been loaded.

Please cite R and 'drc' if used for a publication,  
for references type 'citation()' and 'citation('drc')'.

|    | drug  | LPS | dose   | mean   | sd   |
|----|-------|-----|--------|--------|------|
| 1  | TJ029 | 0   | 0.000  | 100.00 | 4.23 |
| 2  | TJ029 | 0   | 0.500  | 85.52  | 2.93 |
| 3  | TJ029 | 0   | 1.000  | 88.05  | 4.19 |
| 4  | TJ029 | 0   | 2.000  | 90.75  | 4.42 |
| 5  | TJ029 | 0   | 5.000  | 93.05  | 2.75 |
| 6  | TJ029 | 0   | 10.000 | 84.37  | 7.39 |
| 7  | TJ029 | 10  | 0.000  | 98.05  | 4.38 |
| 8  | TJ029 | 10  | 0.500  | 82.19  | 4.17 |
| 9  | TJ029 | 10  | 1.000  | 91.09  | 0.47 |
| 10 | TJ029 | 10  | 2.000  | 86.44  | 5.00 |
| 11 | TJ029 | 10  | 5.000  | 91.50  | 9.95 |
| 12 | TJ029 | 10  | 10.000 | 91.73  | 5.80 |

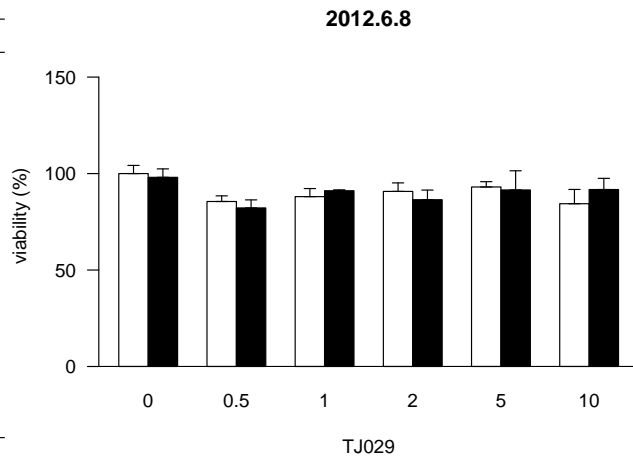

- cells: HGFs (No. 2)
- passages: 14
- cell numbers:  $0.5 \times 10^4$  cells/well
- LPS: PgLPS (10 ng/ml), treatment: 24h

|   | drug  | OD    | mean  |
|---|-------|-------|-------|
| 1 | blank | 0.099 | 0.098 |
| 2 | blank | 0.094 |       |
| 3 | blank | 0.098 |       |
| 4 | blank | 0.098 |       |
| 5 | blank | 0.098 |       |
| 6 | blank | 0.101 |       |
| 7 | blank | 0.105 |       |
| 8 | blank | 0.090 |       |

|    | drug  | LPS | dose   | OD    | viability |
|----|-------|-----|--------|-------|-----------|
| 1  | TJ029 | 0   | 0.000  | 0.443 | 101.8     |
| 2  | TJ029 | 0   | 0.000  | 0.449 | 103.2     |
| 3  | TJ029 | 0   | 0.000  | 0.408 | 93.8      |
| 4  | TJ029 | 0   | 0.000  | 0.440 | 101.1     |
| 5  | TJ029 | 0   | 0.500  | 0.375 | 86.2      |
| 6  | TJ029 | 0   | 0.500  | 0.388 | 89.2      |
| 7  | TJ029 | 0   | 0.500  | 0.358 | 82.3      |
| 8  | TJ029 | 0   | 0.500  | 0.367 | 84.4      |
| 9  | TJ029 | 0   | 1.000  | 0.374 | 86.0      |
| 10 | TJ029 | 0   | 1.000  | 0.364 | 83.7      |
| 11 | TJ029 | 0   | 1.000  | 0.388 | 89.2      |
| 12 | TJ029 | 0   | 1.000  | 0.406 | 93.3      |
| 13 | TJ029 | 0   | 2.000  | 0.393 | 90.3      |
| 14 | TJ029 | 0   | 2.000  | 0.372 | 85.5      |
| 15 | TJ029 | 0   | 2.000  | 0.419 | 96.3      |
| 16 | TJ029 | 0   | 2.000  | 0.395 | 90.8      |
| 17 | TJ029 | 0   | 5.000  | 0.390 | 89.7      |
| 18 | TJ029 | 0   | 5.000  | 0.400 | 92.0      |
| 19 | TJ029 | 0   | 5.000  | 0.414 | 95.2      |
| 20 | TJ029 | 0   | 5.000  | 0.415 | 95.4      |
| 21 | TJ029 | 0   | 10.000 | 0.407 | 93.6      |
| 22 | TJ029 | 0   | 10.000 | 0.335 | 77.0      |
| 23 | TJ029 | 0   | 10.000 | 0.378 | 86.9      |
| 24 | TJ029 | 0   | 10.000 | 0.348 | 80.0      |
| 25 | TJ029 | 10  | 0.000  | 0.406 | 93.3      |
| 26 | TJ029 | 10  | 0.000  | 0.452 | 103.9     |
| 27 | TJ029 | 10  | 0.000  | 0.422 | 97.0      |
| 28 | TJ029 | 10  | 0.000  | 0.426 | 97.9      |
| 29 | TJ029 | 10  | 0.500  | 0.375 | 86.2      |
| 30 | TJ029 | 10  | 0.500  | 0.371 | 85.3      |
| 31 | TJ029 | 10  | 0.500  | 0.339 | 77.9      |
| 32 | TJ029 | 10  | 0.500  | 0.345 | 79.3      |
| 33 | TJ029 | 10  | 1.000  | 0.398 | 91.5      |
| 34 | TJ029 | 10  | 1.000  | 0.394 | 90.6      |
| 35 | TJ029 | 10  | 1.000  | 0.395 | 90.8      |
| 36 | TJ029 | 10  | 1.000  | 0.398 | 91.5      |
| 37 | TJ029 | 10  | 2.000  | 0.387 | 89.0      |
| 38 | TJ029 | 10  | 2.000  | 0.400 | 92.0      |
| 39 | TJ029 | 10  | 2.000  | 0.351 | 80.7      |
| 40 | TJ029 | 10  | 2.000  | 0.366 | 84.1      |
| 41 | TJ029 | 10  | 5.000  | 0.408 | 93.8      |
| 42 | TJ029 | 10  | 5.000  | 0.443 | 101.8     |
| 43 | TJ029 | 10  | 5.000  | 0.402 | 92.4      |
| 44 | TJ029 | 10  | 5.000  | 0.339 | 77.9      |
| 45 | TJ029 | 10  | 10.000 | 0.402 | 92.4      |
| 46 | TJ029 | 10  | 10.000 | 0.372 | 85.5      |
| 47 | TJ029 | 10  | 10.000 | 0.390 | 89.7      |
| 48 | TJ029 | 10  | 10.000 | 0.432 | 99.3      |
