# Supplementary material for: Effects of shinbuto and ninjinto on prostaglandin E 2 production in lipopolysaccharide-treated human gingival fibroblasts
Source: PeerJ journal article supplement (doi:10.7717/peerj.4120), 2017-12-01
Supplement: raw_data_Fig1_2_3_6.zip [file raw_data_Fig1_2_3_6.zip]

- Exp. 6
- Condition
  - drug1: PgLPS (pg/ml)
  - drug2: TJ032 (mg/ml)
  - experimental No. 1
  - treatment: 24h
- Measurement
  - PGE2
  - Date: 2012.7.6
- Cells
  - cells: HGFs (No. 1), passages: 15
  - cell numbers:  $1 \times 10^4$  cells/well =  $5 \times 10^4$  cells/ml

|   | conc.  | OD    |
|---|--------|-------|
| 1 | 7.8    | 0.802 |
| 2 | 15.6   | 0.726 |
| 3 | 31.2   | 0.707 |
| 4 | 62.5   | 0.580 |
| 5 | 125.0  | 0.428 |
| 6 | 250.0  | 0.318 |
| 7 | 500.0  | 0.243 |
| 8 | 1000.0 | 0.191 |

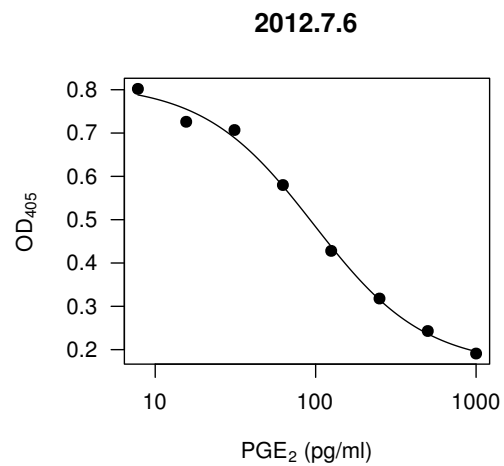

|   | drug1 | drug2 | mean  | SD    |
|---|-------|-------|-------|-------|
| 1 | 0     | 0.000 | 0.017 | 0.004 |
| 2 | 0     | 0.010 | 0.018 | 0.007 |
| 3 | 0     | 0.100 | 0.010 | 0.001 |
| 4 | 0     | 1.000 | 0.006 | 0.001 |
| 5 | 10    | 0.000 | 0.449 | 0.043 |
| 6 | 10    | 0.010 | 0.359 | 0.041 |
| 7 | 10    | 0.100 | 0.291 | 0.027 |
| 8 | 10    | 1.000 | 0.061 | 0.024 |

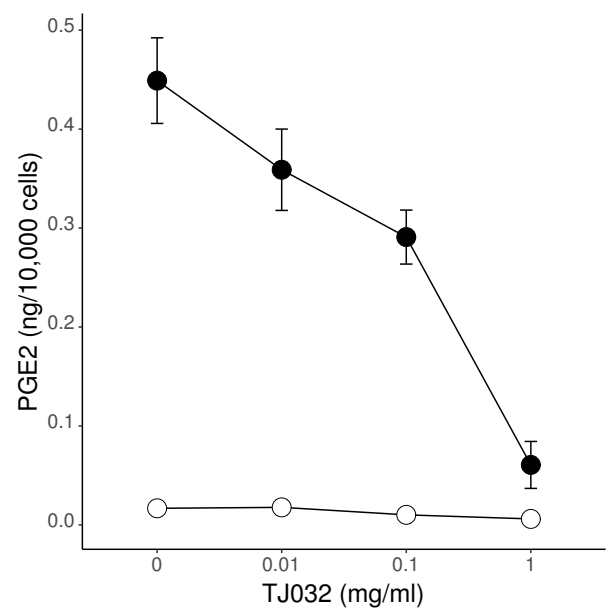

|    | drug1 | drug2 | viability | dilution | OD    | conc. (pg/ml) | net (ng/ml) | (ng/10,000 cells) |
|----|-------|-------|-----------|----------|-------|---------------|-------------|-------------------|
| 1  | 0     | 0.000 | 102.23    | 5        | 0.737 | 19.80         | 0.099       | 0.019             |
| 2  | 0     | 0.000 | 96.79     | 5        | 0.742 | 18.64         | 0.093       | 0.019             |
| 3  | 0     | 0.000 | 100.99    | 5        | 0.771 | 11.90         | 0.060       | 0.012             |
| 4  | 0     | 0.010 | 102.23    | 5        | 0.773 | 11.43         | 0.057       | 0.011             |
| 5  | 0     | 0.010 | 95.23     | 5        | 0.719 | 24.00         | 0.120       | 0.025             |
| 6  | 0     | 0.010 | 100.67    | 5        | 0.749 | 17.03         | 0.085       | 0.017             |
| 7  | 0     | 0.100 | 104.41    | 5        | 0.776 | 10.72         | 0.054       | 0.010             |
| 8  | 0     | 0.100 | 97.56     | 5        | 0.783 | 9.03          | 0.045       | 0.009             |
| 9  | 0     | 0.100 | 101.45    | 5        | 0.774 | 11.20         | 0.056       | 0.011             |
| 10 | 0     | 1.000 | 104.10    | 5        | 0.794 | 6.28          | 0.031       | 0.006             |
| 11 | 0     | 1.000 | 99.27     | 5        | 0.798 | 5.23          | 0.026       | 0.005             |
| 12 | 0     | 1.000 | 101.92    | 5        | 0.791 | 7.05          | 0.035       | 0.007             |
| 13 | 10    | 0.000 | 103.16    | 5        | 0.238 | 490.75        | 2.454       | 0.476             |
| 14 | 10    | 0.000 | 104.25    | 5        | 0.253 | 416.05        | 2.080       | 0.399             |
| 15 | 10    | 0.000 | 102.70    | 5        | 0.239 | 484.97        | 2.425       | 0.472             |
| 16 | 10    | 0.010 | 105.18    | 5        | 0.251 | 424.71        | 2.124       | 0.404             |
| 17 | 10    | 0.010 | 103.01    | 5        | 0.268 | 360.44        | 1.802       | 0.350             |
| 18 | 10    | 0.010 | 103.16    | 5        | 0.277 | 333.30        | 1.667       | 0.323             |
| 19 | 10    | 0.100 | 101.76    | 5        | 0.296 | 286.69        | 1.433       | 0.282             |
| 20 | 10    | 0.100 | 103.32    | 5        | 0.300 | 278.33        | 1.392       | 0.269             |
| 21 | 10    | 0.100 | 101.92    | 5        | 0.279 | 327.77        | 1.639       | 0.322             |
| 22 | 10    | 1.000 | 101.61    | 5        | 0.637 | 44.64         | 0.223       | 0.044             |
| 23 | 10    | 1.000 | 104.25    | 5        | 0.610 | 52.35         | 0.262       | 0.050             |
| 24 | 10    | 1.000 | 103.01    | 5        | 0.504 | 90.45         | 0.452       | 0.088             |
