# Supplementary material for: Effects of shinbuto and ninjinto on prostaglandin E 2 production in lipopolysaccharide-treated human gingival fibroblasts
Source: PeerJ journal article supplement (doi:10.7717/peerj.4120), 2017-12-01
Supplement: raw_data_Fig1_2_3_6.zip [file raw_data_Fig1_2_3_6.zip]

- Exp. 25
- Condition
  - drug1: shokyo (ug/ml)
  - experimental No. 2
  - treatment: 24h
- Measurement
  - PGE2
  - Date: 2017.4.11
- Cells
  - cells: HGFs (No. 1), passages: 13
  - cell numbers:  $0.8 \times 10^4$  cells/well =  $4 \times 10^4$  cells/ml

|   | conc.  | OD    |
|---|--------|-------|
| 1 | 7.8    | 1.061 |
| 2 | 15.6   | 0.911 |
| 3 | 31.2   | 0.755 |
| 4 | 62.5   | 0.624 |
| 5 | 125.0  | 0.408 |
| 6 | 250.0  | 0.280 |
| 7 | 500.0  | 0.239 |
| 8 | 1000.0 | 0.205 |

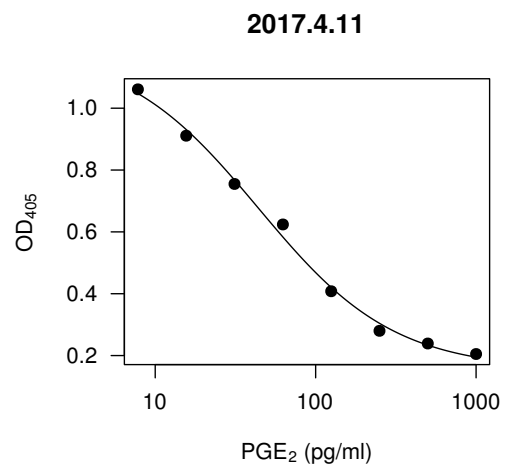

|   | drug1 | mean  | SD    |
|---|-------|-------|-------|
| 1 | 0     | 0.414 | 0.093 |
| 2 | 1     | 0.301 | 0.032 |
| 3 | 10    | 0.212 | 0.046 |
| 4 | 100   | 0.068 | 0.042 |

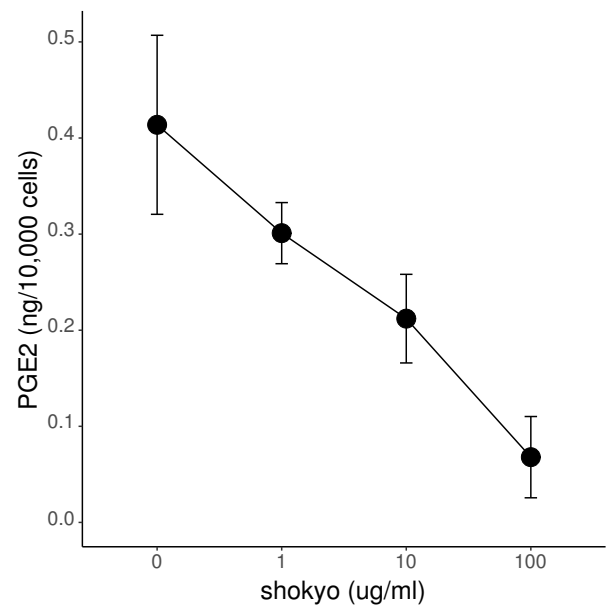

|    | drug1 | viability | dilution | OD    | conc. (pg/ml) | net (ng/ml) | (ng/10,000 cells) |
|----|-------|-----------|----------|-------|---------------|-------------|-------------------|
| 1  | 0     | 96.29     | 25       | 0.526 | 78.37         | 1.959       | 0.509             |
| 2  | 0     | 102.23    | 25       | 0.628 | 52.75         | 1.319       | 0.322             |
| 3  | 0     | 101.47    | 25       | 0.567 | 66.58         | 1.664       | 0.410             |
| 4  | 1     | 101.32    | 25       | 0.624 | 53.54         | 1.339       | 0.330             |
| 5  | 1     | 113.20    | 25       | 0.651 | 48.39         | 1.210       | 0.267             |
| 6  | 1     | 100.86    | 25       | 0.646 | 49.30         | 1.233       | 0.306             |
| 7  | 10    | 102.39    | 25       | 0.680 | 43.43         | 1.086       | 0.265             |
| 8  | 10    | 100.71    | 25       | 0.784 | 29.30         | 0.733       | 0.182             |
| 9  | 10    | 97.97     | 25       | 0.781 | 29.65         | 0.741       | 0.189             |
| 10 | 100   | 114.57    | 25       | 1.047 | 7.83          | 0.196       | 0.043             |
| 11 | 100   | 109.69    | 25       | 1.048 | 7.77          | 0.194       | 0.044             |
| 12 | 100   | 102.54    | 25       | 0.887 | 19.15         | 0.479       | 0.117             |
