# Supplementary material for: Effects of shinbuto and ninjinto on prostaglandin E 2 production in lipopolysaccharide-treated human gingival fibroblasts
Source: PeerJ journal article supplement (doi:10.7717/peerj.4120), 2017-12-01
Supplement: raw_data_Fig1_2_3_6.zip [file raw_data_Fig1_2_3_6.zip]

- Exp. 6
- Condition
  - drug1: PgLPS (pg/ml)
  - drug2: TJ030 (mg/ml)
  - experimental No. 1
  - treatment: 24h
- Measurement
  - IL-6
  - Date: 2013.3.12
- Cells
  - cells: HGFs (No. 1), passages: 15
  - cell numbers:  $1 \times 10^4$  cells/well =  $5 \times 10^4$  cells/ml

**2013.3.12**

|   | conc.  | OD    | OD-blank |
|---|--------|-------|----------|
| 1 | 0.0    | 0.078 | 0.000    |
| 2 | 15.6   | 0.097 | 0.019    |
| 3 | 31.2   | 0.122 | 0.044    |
| 4 | 62.5   | 0.188 | 0.110    |
| 5 | 125.0  | 0.308 | 0.230    |
| 6 | 250.0  | 0.382 | 0.304    |
| 7 | 500.0  | 0.488 | 0.410    |
| 8 | 1000.0 | 0.650 | 0.572    |

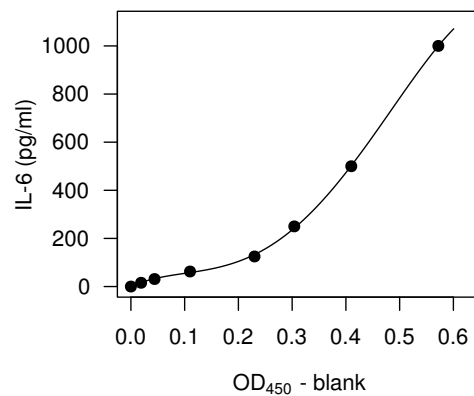

|   | drug1 | drug2 | mean  | SD    |
|---|-------|-------|-------|-------|
| 1 | 0     | 0.000 | 0.008 | 0.007 |
| 2 | 0     | 0.010 | 0.008 | 0.014 |
| 3 | 0     | 0.100 | 0.021 | 0.018 |
| 4 | 0     | 1.000 | 0.035 | 0.011 |
| 5 | 10    | 0.000 | 0.784 | 0.185 |
| 6 | 10    | 0.010 | 0.803 | 0.163 |
| 7 | 10    | 0.100 | 1.294 | 0.053 |
| 8 | 10    | 1.000 | 1.278 | 0.291 |

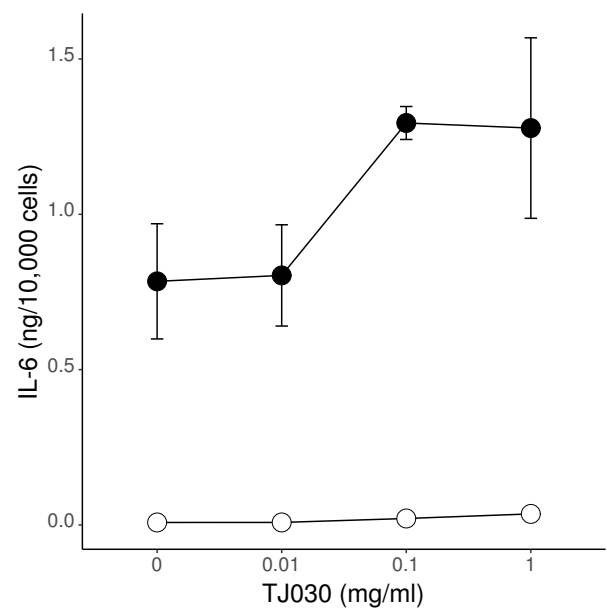

|    | drug1 | drug2 | viability | dilution | OD    | conc. (pg/ml) | net (ng/ml) | (ng/10,000 cells) |
|----|-------|-------|-----------|----------|-------|---------------|-------------|-------------------|
| 1  | 0     | 0.000 | 103.89    | 20       | 0.081 | 2.97          | 0.059       | 0.011             |
| 2  | 0     | 0.000 | 95.67     | 20       | 0.081 | 2.97          | 0.059       | 0.012             |
| 3  | 0     | 0.000 | 100.43    | 20       | 0.078 | 0.00          | 0.000       | 0.000             |
| 4  | 0     | 0.010 | 104.18    | 20       | 0.078 | 0.00          | 0.000       | 0.000             |
| 5  | 0     | 0.010 | 96.68     | 20       | 0.084 | 5.82          | 0.116       | 0.024             |
| 6  | 0     | 0.010 | 99.28     | 20       | 0.078 | 0.00          | 0.000       | 0.000             |
| 7  | 0     | 0.100 | 104.04    | 20       | 0.083 | 4.89          | 0.098       | 0.019             |
| 8  | 0     | 0.100 | 95.67     | 20       | 0.088 | 9.43          | 0.189       | 0.039             |
| 9  | 0     | 0.100 | 98.85     | 20       | 0.079 | 1.01          | 0.020       | 0.004             |
| 10 | 0     | 1.000 | 101.15    | 20       | 0.084 | 5.82          | 0.116       | 0.023             |
| 11 | 0     | 1.000 | 96.54     | 20       | 0.088 | 9.43          | 0.189       | 0.039             |
| 12 | 0     | 1.000 | 100.43    | 20       | 0.090 | 11.15         | 0.223       | 0.044             |
| 13 | 10    | 0.000 | 100.14    | 20       | 0.369 | 219.14        | 4.383       | 0.875             |
| 14 | 10    | 0.000 | 101.44    | 20       | 0.375 | 229.85        | 4.597       | 0.906             |
| 15 | 10    | 0.000 | 99.42     | 20       | 0.316 | 141.88        | 2.838       | 0.571             |
| 16 | 10    | 0.010 | 98.13     | 20       | 0.327 | 155.41        | 3.108       | 0.633             |
| 17 | 10    | 0.010 | 99.71     | 20       | 0.360 | 203.84        | 4.077       | 0.818             |
| 18 | 10    | 0.010 | 98.99     | 20       | 0.379 | 237.21        | 4.744       | 0.959             |
| 19 | 10    | 0.100 | 100.29    | 20       | 0.427 | 339.31        | 6.786       | 1.353             |
| 20 | 10    | 0.100 | 101.01    | 20       | 0.417 | 316.00        | 6.320       | 1.251             |
| 21 | 10    | 0.100 | 98.27     | 20       | 0.416 | 313.72        | 6.274       | 1.277             |
| 22 | 10    | 1.000 | 98.99     | 20       | 0.450 | 396.77        | 7.935       | 1.603             |
| 23 | 10    | 1.000 | 102.16    | 20       | 0.411 | 302.51        | 6.050       | 1.184             |
| 24 | 10    | 1.000 | 100.43    | 20       | 0.392 | 262.37        | 5.247       | 1.045             |
