# Supplementary material for: Effects of shinbuto and ninjinto on prostaglandin E 2 production in lipopolysaccharide-treated human gingival fibroblasts
Source: PeerJ journal article supplement (doi:10.7717/peerj.4120), 2017-12-01
Supplement: raw_data_Fig1_2_3_6.zip [file raw_data_Fig1_2_3_6.zip]

- Exp. 6
- Condition
  - drug1: PgLPS (pg/ml)
  - drug2: TJ029 (mg/ml)
  - experimental No. 1
  - treatment: 24h
- Measurement
  - IL-6
  - Date: 2013.11.1
- Cells
  - cells: HGFs (No. 1), passages: 15
  - cell numbers:  $1 \times 10^4$  cells/well =  $5 \times 10^4$  cells/ml

|   | conc. | OD    | OD-blank |
|---|-------|-------|----------|
| 1 | 0     | 0.063 | 0.000    |
| 2 | 125   | 0.220 | 0.157    |
| 3 | 250   | 0.318 | 0.255    |
| 4 | 500   | 0.492 | 0.429    |
| 5 | 1000  | 0.919 | 0.856    |

|   | drug1 | drug2 | mean  | SD    |
|---|-------|-------|-------|-------|
| 1 | 0     | 0.000 | 0.009 | 0.002 |
| 2 | 0     | 0.010 | 0.008 | 0.004 |
| 3 | 0     | 0.100 | 0.011 | 0.001 |
| 4 | 0     | 1.000 | 0.014 | 0.001 |
| 5 | 10    | 0.000 | 1.521 | 0.226 |
| 6 | 10    | 0.010 | 1.541 | 0.134 |
| 7 | 10    | 0.100 | 1.680 | 0.148 |
| 8 | 10    | 1.000 | 1.806 | 0.025 |

**2013.11.1**

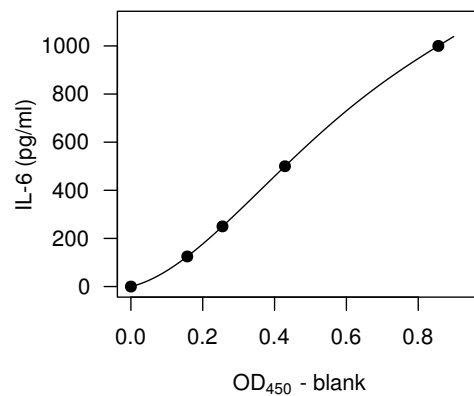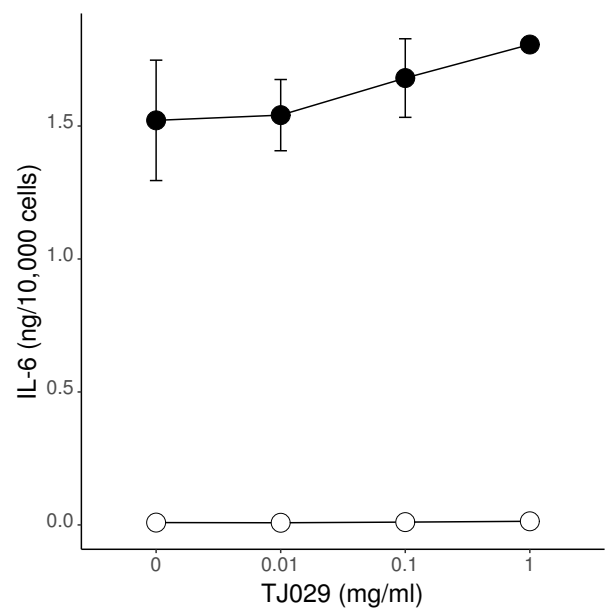

|    | drug1 | drug2 | viability | dilution | OD    | conc. (pg/ml) | net (ng/ml) | (ng/10,000 cells) |
|----|-------|-------|-----------|----------|-------|---------------|-------------|-------------------|
| 1  | 0     | 0.000 | 103.89    | 10       | 0.073 | 3.85          | 0.039       | 0.007             |
| 2  | 0     | 0.000 | 95.67     | 10       | 0.073 | 3.85          | 0.039       | 0.008             |
| 3  | 0     | 0.000 | 100.43    | 10       | 0.077 | 5.58          | 0.056       | 0.011             |
| 4  | 0     | 0.010 | 104.18    | 10       | 0.069 | 2.23          | 0.022       | 0.004             |
| 5  | 0     | 0.010 | 96.68     | 10       | 0.072 | 3.43          | 0.034       | 0.007             |
| 6  | 0     | 0.010 | 99.28     | 10       | 0.079 | 6.49          | 0.065       | 0.013             |
| 7  | 0     | 0.100 | 104.04    | 10       | 0.078 | 6.03          | 0.060       | 0.012             |
| 8  | 0     | 0.100 | 95.67     | 10       | 0.076 | 5.14          | 0.051       | 0.011             |
| 9  | 0     | 0.100 | 98.85     | 10       | 0.075 | 4.70          | 0.047       | 0.010             |
| 10 | 0     | 1.000 | 101.15    | 10       | 0.080 | 6.95          | 0.069       | 0.014             |
| 11 | 0     | 1.000 | 96.54     | 10       | 0.078 | 6.03          | 0.060       | 0.012             |
| 12 | 0     | 1.000 | 100.43    | 10       | 0.081 | 7.42          | 0.074       | 0.015             |
| 13 | 10    | 0.000 | 100.14    | 10       | 0.654 | 718.94        | 7.189       | 1.436             |
| 14 | 10    | 0.000 | 101.44    | 10       | 0.627 | 684.76        | 6.848       | 1.350             |
| 15 | 10    | 0.000 | 99.42     | 10       | 0.799 | 883.82        | 8.838       | 1.778             |
| 16 | 10    | 0.010 | 98.13     | 10       | 0.735 | 814.90        | 8.149       | 1.661             |
| 17 | 10    | 0.010 | 99.71     | 10       | 0.705 | 780.52        | 7.805       | 1.566             |
| 18 | 10    | 0.010 | 98.99     | 10       | 0.632 | 691.17        | 6.912       | 1.396             |
| 19 | 10    | 0.100 | 100.29    | 10       | 0.748 | 829.37        | 8.294       | 1.654             |
| 20 | 10    | 0.100 | 101.01    | 10       | 0.844 | 929.05        | 9.290       | 1.840             |
| 21 | 10    | 0.100 | 98.27     | 10       | 0.688 | 760.43        | 7.604       | 1.548             |
| 22 | 10    | 1.000 | 98.99     | 10       | 0.813 | 898.15        | 8.982       | 1.815             |
| 23 | 10    | 1.000 | 102.16    | 10       | 0.823 | 908.24        | 9.082       | 1.778             |
| 24 | 10    | 1.000 | 100.43    | 10       | 0.832 | 917.22        | 9.172       | 1.827             |
