# Supplementary material for: Effects of shinbuto and ninjinto on prostaglandin E 2 production in lipopolysaccharide-treated human gingival fibroblasts
Source: PeerJ journal article supplement (doi:10.7717/peerj.4120), 2017-12-01
Supplement: raw_data_Fig1_2_3_6.zip [file raw_data_Fig1_2_3_6.zip]

- Exp. 6
- Condition
  - drug1: PgLPS (pg/ml)
  - drug2: TJ030 (mg/ml)
  - experimental No. 1
  - treatment: 24h
- Measurement
  - WST-8
  - Date: 2012.7.5
- Cells
  - cells: HGFs (No. 1), passages: 15
  - cell numbers:  $1 \times 10^4$  cells/well

|   | drug1 | drug2 | mean  | SD  |
|---|-------|-------|-------|-----|
| 1 | 0     | 0.000 | 100.0 | 3.6 |
| 2 | 0     | 0.010 | 99.4  | 3.7 |
| 3 | 0     | 0.100 | 99.9  | 4.0 |
| 4 | 0     | 1.000 | 100.1 | 2.8 |
| 5 | 10    | 0.000 | 100.8 | 0.9 |
| 6 | 10    | 0.010 | 99.0  | 0.4 |
| 7 | 10    | 0.100 | 100.1 | 2.7 |
| 8 | 10    | 1.000 | 100.4 | 1.5 |

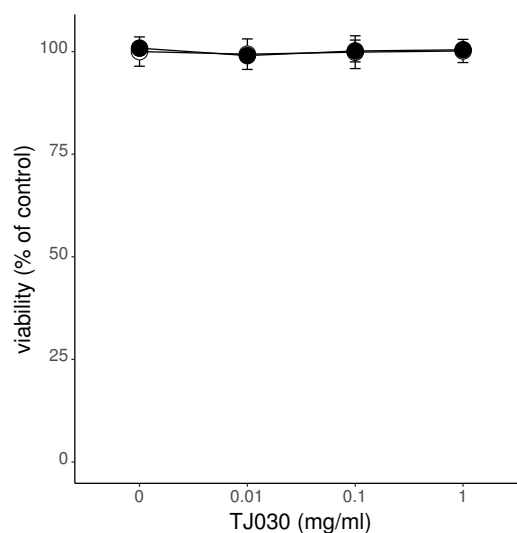

|   | OD    | mean  |
|---|-------|-------|
| 1 | 0.054 | 0.057 |
| 2 | 0.048 |       |
| 3 | 0.055 |       |
| 4 | 0.054 |       |
| 5 | 0.055 |       |
| 6 | 0.075 |       |
| 7 | 0.057 |       |
| 8 | 0.056 |       |

|    | drug1 | drug2 | OD    | OD-blank | viability |
|----|-------|-------|-------|----------|-----------|
| 1  | 0     | 0.000 | 0.762 | 0.705    | 103.1     |
| 2  | 0     | 0.000 | 0.714 | 0.657    | 96.1      |
| 3  | 0     | 0.000 | 0.746 | 0.689    | 100.8     |
| 4  | 0     | 0.010 | 0.764 | 0.707    | 103.4     |
| 5  | 0     | 0.010 | 0.714 | 0.657    | 96.1      |
| 6  | 0     | 0.010 | 0.731 | 0.674    | 98.6      |
| 7  | 0     | 0.100 | 0.770 | 0.713    | 104.3     |
| 8  | 0     | 0.100 | 0.717 | 0.660    | 96.5      |
| 9  | 0     | 0.100 | 0.732 | 0.675    | 98.7      |
| 10 | 0     | 1.000 | 0.757 | 0.700    | 102.4     |
| 11 | 0     | 1.000 | 0.720 | 0.663    | 97.0      |
| 12 | 0     | 1.000 | 0.748 | 0.691    | 101.1     |
| 13 | 10    | 0.000 | 0.747 | 0.690    | 100.9     |
| 14 | 10    | 0.000 | 0.752 | 0.695    | 101.7     |
| 15 | 10    | 0.000 | 0.740 | 0.683    | 99.9      |
| 16 | 10    | 0.010 | 0.731 | 0.674    | 98.6      |
| 17 | 10    | 0.010 | 0.734 | 0.677    | 99.0      |
| 18 | 10    | 0.010 | 0.737 | 0.680    | 99.5      |
| 19 | 10    | 0.100 | 0.727 | 0.670    | 98.0      |
| 20 | 10    | 0.100 | 0.762 | 0.705    | 103.1     |
| 21 | 10    | 0.100 | 0.736 | 0.679    | 99.3      |
| 22 | 10    | 1.000 | 0.734 | 0.677    | 99.0      |
| 23 | 10    | 1.000 | 0.754 | 0.697    | 101.9     |
| 24 | 10    | 1.000 | 0.743 | 0.686    | 100.3     |
