# Supplementary material for: Effects of shinbuto and ninjinto on prostaglandin E 2 production in lipopolysaccharide-treated human gingival fibroblasts
Source: PeerJ journal article supplement (doi:10.7717/peerj.4120), 2017-12-01
Supplement: raw_data_Fig1_2_3_6.zip [file raw_data_Fig1_2_3_6.zip]

- Exp. 25
- Condition
  - drug1: herb ()
  - experimental No. 2
  - treatment: 24h
- Measurement
  - PGE2
  - Date: 2017.1.28
- Cells
  - cells: HGFs (No. 1), passages: 13
  - cell numbers:  $0.667 \times 10^4$  cells/well =  $3.335 \times 10^4$  cells/ml

|   | conc.  | OD    |
|---|--------|-------|
| 1 | 7.8    | 0.553 |
| 2 | 15.6   | 0.455 |
| 3 | 31.2   | 0.370 |
| 4 | 62.5   | 0.307 |
| 5 | 125.0  | 0.270 |
| 6 | 250.0  | 0.229 |
| 7 | 500.0  | 0.210 |
| 8 | 1000.0 | 0.197 |

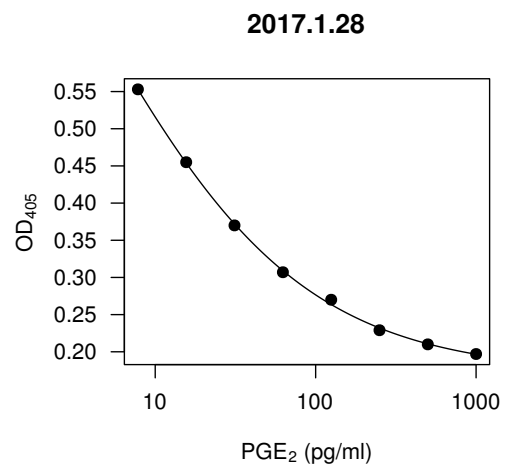

|    | drug1 | mean  | SD    |
|----|-------|-------|-------|
| 1  | 1     | 0.173 | 0.043 |
| 2  | 2     | 1.887 | 0.507 |
| 3  | 3     | 2.806 | 0.257 |
| 4  | 4     | 1.367 | 0.159 |
| 5  | 5     | 1.979 | 0.384 |
| 6  | 6     | 0.555 | 0.047 |
| 7  | 7     | 1.808 | 0.330 |
| 8  | 8     | 0.322 | 0.024 |
| 9  | 9     | 0.889 | 0.111 |
| 10 | 10    | 2.123 | 0.401 |

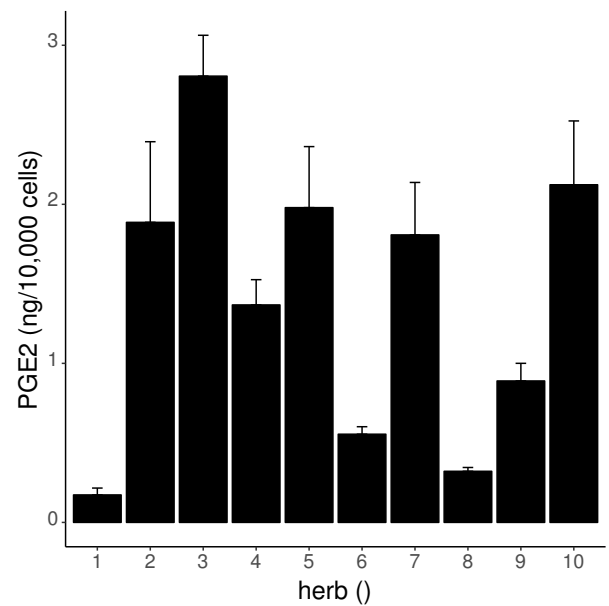

|    | drug1 | viability | dilution | OD    | conc. (pg/ml) | net (ng/ml) | (ng/10,000 cells) |
|----|-------|-----------|----------|-------|---------------|-------------|-------------------|
| 1  | 1     | 95.83     | 50       | 0.468 | 14.04         | 0.702       | 0.220             |
| 2  | 1     | 105.74    | 50       | 0.523 | 9.52          | 0.476       | 0.135             |
| 3  | 1     | 98.43     | 50       | 0.505 | 10.77         | 0.539       | 0.164             |
| 4  | 2     | 109.15    | 50       | 0.246 | 177.90        | 8.895       | 2.444             |
| 5  | 2     | 111.27    | 50       | 0.272 | 107.80        | 5.390       | 1.452             |
| 6  | 2     | 111.43    | 50       | 0.261 | 131.12        | 6.556       | 1.764             |
| 7  | 3     | 105.25    | 50       | 0.243 | 190.36        | 9.518       | 2.712             |
| 8  | 3     | 106.88    | 50       | 0.244 | 186.06        | 9.303       | 2.610             |
| 9  | 3     | 103.79    | 50       | 0.238 | 214.37        | 10.719      | 3.097             |
| 10 | 4     | 110.94    | 50       | 0.274 | 104.24        | 5.212       | 1.409             |
| 11 | 4     | 111.75    | 50       | 0.284 | 88.86         | 4.443       | 1.192             |
| 12 | 4     | 109.48    | 50       | 0.271 | 109.64        | 5.482       | 1.501             |
| 13 | 5     | 107.85    | 50       | 0.247 | 174.03        | 8.702       | 2.419             |
| 14 | 5     | 108.99    | 50       | 0.261 | 131.12        | 6.556       | 1.804             |
| 15 | 5     | 110.45    | 50       | 0.263 | 126.33        | 6.317       | 1.715             |
| 16 | 6     | 81.69     | 50       | 0.369 | 32.13         | 1.606       | 0.590             |
| 17 | 6     | 102.82    | 50       | 0.349 | 39.31         | 1.965       | 0.573             |
| 18 | 6     | 103.95    | 50       | 0.361 | 34.76         | 1.738       | 0.501             |
| 19 | 7     | 110.29    | 50       | 0.252 | 156.50        | 7.825       | 2.127             |
| 20 | 7     | 111.75    | 50       | 0.259 | 136.18        | 6.809       | 1.827             |
| 21 | 7     | 111.92    | 50       | 0.271 | 109.64        | 5.482       | 1.469             |
| 22 | 8     | 110.29    | 50       | 0.394 | 25.48         | 1.274       | 0.346             |
| 23 | 8     | 111.27    | 50       | 0.410 | 22.18         | 1.109       | 0.299             |
| 24 | 8     | 108.67    | 50       | 0.405 | 23.15         | 1.157       | 0.319             |
| 25 | 9     | 113.70    | 50       | 0.294 | 76.66         | 3.833       | 1.011             |
| 26 | 9     | 113.70    | 50       | 0.312 | 60.19         | 3.010       | 0.794             |
| 27 | 9     | 112.89    | 50       | 0.306 | 65.05         | 3.252       | 0.864             |
| 28 | 10    | 108.02    | 50       | 0.244 | 186.06        | 9.303       | 2.582             |
| 29 | 10    | 104.77    | 50       | 0.262 | 128.69        | 6.435       | 1.842             |
| 30 | 10    | 111.27    | 50       | 0.256 | 144.36        | 7.218       | 1.945             |
