# Supplementary material for: Effects of shinbuto and ninjinto on prostaglandin E 2 production in lipopolysaccharide-treated human gingival fibroblasts
Source: PeerJ journal article supplement (doi:10.7717/peerj.4120), 2017-12-01
Supplement: raw_data_Fig1_2_3_6.zip [file raw_data_Fig1_2_3_6.zip]

- Exp. 6
- Condition
  - drug1: PgLPS (pg/ml)
  - drug2: TJ030 (mg/ml)
  - experimental No. 1
  - treatment: 24h
- Measurement
  - IL-6
  - Date: 2013.3.12
- Cells
  - cells: HGFs (No. 1), passages: 15
  - cell numbers:  $1 \times 10^4$  cells/well =  $5 \times 10^4$  cells/ml

**2013.3.12**

|   | conc.  | OD    | OD-blank |
|---|--------|-------|----------|
| 1 | 0.0    | 0.075 | 0.000    |
| 2 | 15.6   | 0.097 | 0.022    |
| 3 | 31.2   | 0.122 | 0.047    |
| 4 | 62.5   | 0.188 | 0.113    |
| 5 | 125.0  | 0.308 | 0.233    |
| 6 | 250.0  | 0.382 | 0.307    |
| 7 | 500.0  | 0.488 | 0.413    |
| 8 | 1000.0 | 0.650 | 0.575    |

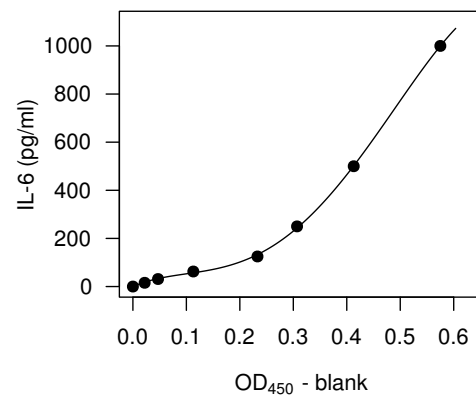

|   | drug1 | drug2 | mean  | SD    |
|---|-------|-------|-------|-------|
| 1 | 0     | 0.000 | 0.001 | 0.002 |
| 2 | 0     | 0.010 | 0.008 | 0.004 |
| 3 | 0     | 0.100 | 0.006 | 0.006 |
| 4 | 0     | 1.000 | 0.072 | 0.025 |
| 5 | 10    | 0.000 | 0.436 | 0.133 |
| 6 | 10    | 0.010 | 0.536 | 0.050 |
| 7 | 10    | 0.100 | 1.114 | 0.237 |
| 8 | 10    | 1.000 | 0.972 | 0.269 |

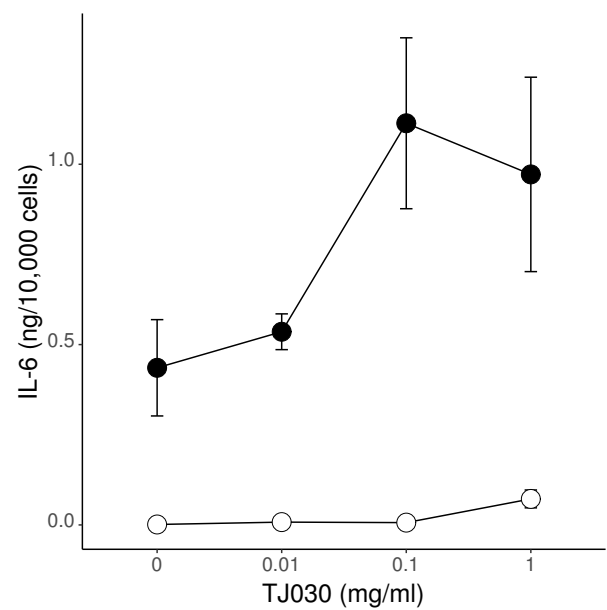

|    | drug1 | drug2 | viability | dilution | OD    | conc. (pg/ml) | net (ng/ml) | (ng/10,000 cells) |
|----|-------|-------|-----------|----------|-------|---------------|-------------|-------------------|
| 1  | 0     | 0.000 | 102.23    | 20       | 0.076 | 0.97          | 0.019       | 0.004             |
| 2  | 0     | 0.000 | 96.79     | 20       | 0.075 | 0.00          | 0.000       | 0.000             |
| 3  | 0     | 0.000 | 100.99    | 20       | 0.075 | 0.00          | 0.000       | 0.000             |
| 4  | 0     | 0.010 | 102.23    | 20       | 0.076 | 0.97          | 0.019       | 0.004             |
| 5  | 0     | 0.010 | 95.23     | 20       | 0.078 | 2.86          | 0.057       | 0.012             |
| 6  | 0     | 0.010 | 100.67    | 20       | 0.077 | 1.92          | 0.038       | 0.008             |
| 7  | 0     | 0.100 | 104.41    | 20       | 0.075 | 0.00          | 0.000       | 0.000             |
| 8  | 0     | 0.100 | 97.56     | 20       | 0.078 | 2.86          | 0.057       | 0.012             |
| 9  | 0     | 0.100 | 101.45    | 20       | 0.077 | 1.92          | 0.038       | 0.008             |
| 10 | 0     | 1.000 | 104.10    | 20       | 0.109 | 26.05         | 0.521       | 0.100             |
| 11 | 0     | 1.000 | 99.27     | 20       | 0.090 | 13.12         | 0.262       | 0.053             |
| 12 | 0     | 1.000 | 101.92    | 20       | 0.094 | 16.15         | 0.323       | 0.063             |
| 13 | 10    | 0.000 | 103.16    | 20       | 0.282 | 107.49        | 2.150       | 0.417             |
| 14 | 10    | 0.000 | 104.25    | 20       | 0.323 | 150.53        | 3.011       | 0.578             |
| 15 | 10    | 0.000 | 102.70    | 20       | 0.243 | 80.26         | 1.605       | 0.313             |
| 16 | 10    | 0.010 | 105.18    | 20       | 0.321 | 148.05        | 2.961       | 0.563             |
| 17 | 10    | 0.010 | 103.01    | 20       | 0.319 | 145.60        | 2.912       | 0.565             |
| 18 | 10    | 0.010 | 103.16    | 20       | 0.299 | 123.36        | 2.467       | 0.478             |
| 19 | 10    | 0.100 | 101.76    | 20       | 0.432 | 351.66        | 7.033       | 1.382             |
| 20 | 10    | 0.100 | 103.32    | 20       | 0.381 | 241.44        | 4.829       | 0.935             |
| 21 | 10    | 0.100 | 101.92    | 20       | 0.391 | 260.85        | 5.217       | 1.024             |
| 22 | 10    | 1.000 | 101.61    | 20       | 0.400 | 279.25        | 5.585       | 1.099             |
| 23 | 10    | 1.000 | 104.25    | 20       | 0.410 | 300.73        | 6.015       | 1.154             |
| 24 | 10    | 1.000 | 103.01    | 20       | 0.338 | 170.54        | 3.411       | 0.662             |
