# Supplementary material for: Effects of shinbuto and ninjinto on prostaglandin E 2 production in lipopolysaccharide-treated human gingival fibroblasts
Source: PeerJ journal article supplement (doi:10.7717/peerj.4120), 2017-12-01
Supplement: raw_data_Fig1_2_3_6.zip [file raw_data_Fig1_2_3_6.zip]

- Exp. 6
- Condition
  - drug1: PgLPS (pg/ml)
  - drug2: TJ041 (mg/ml)
  - experimental No. 1
  - treatment: 24h
- Measurement
  - WST-8
  - Date: 2012.7.5
- Cells
  - cells: HGFs (No. 1), passages: 15
  - cell numbers:  $1 \times 10^4$  cells/well

|   | drug1 | drug2 | mean  | SD  |
|---|-------|-------|-------|-----|
| 1 | 0     | 0.000 | 100.0 | 3.3 |
| 2 | 0     | 0.010 | 98.0  | 2.7 |
| 3 | 0     | 0.100 | 99.4  | 3.5 |
| 4 | 0     | 1.000 | 100.3 | 2.6 |
| 5 | 10    | 0.000 | 101.5 | 1.3 |
| 6 | 10    | 0.010 | 101.1 | 0.9 |
| 7 | 10    | 0.100 | 102.3 | 1.9 |
| 8 | 10    | 1.000 | 102.0 | 1.6 |

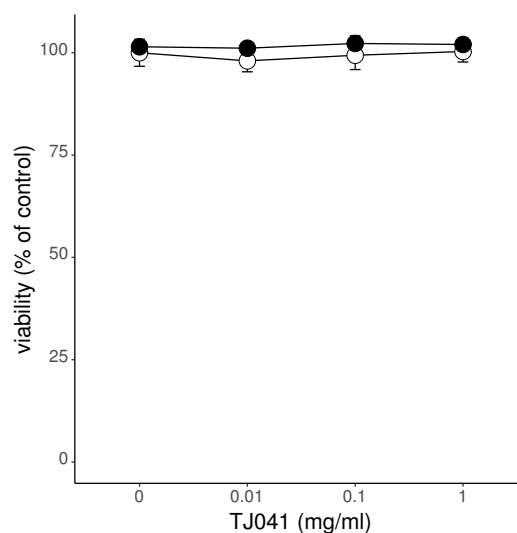

|   | OD    | mean  |
|---|-------|-------|
| 1 | 0.059 | 0.058 |
| 2 | 0.048 |       |
| 3 | 0.056 |       |
| 4 | 0.055 |       |
| 5 | 0.056 |       |
| 6 | 0.077 |       |
| 7 | 0.058 |       |
| 8 | 0.054 |       |

|    | drug1 | drug2 | OD    | OD-blank | viability |
|----|-------|-------|-------|----------|-----------|
| 1  | 0     | 0.000 | 0.734 | 0.676    | 102.7     |
| 2  | 0     | 0.000 | 0.692 | 0.634    | 96.3      |
| 3  | 0     | 0.000 | 0.723 | 0.665    | 101.0     |
| 4  | 0     | 0.010 | 0.713 | 0.655    | 99.5      |
| 5  | 0     | 0.010 | 0.683 | 0.625    | 94.9      |
| 6  | 0     | 0.010 | 0.714 | 0.656    | 99.6      |
| 7  | 0     | 0.100 | 0.735 | 0.677    | 102.8     |
| 8  | 0     | 0.100 | 0.689 | 0.631    | 95.8      |
| 9  | 0     | 0.100 | 0.713 | 0.655    | 99.5      |
| 10 | 0     | 1.000 | 0.726 | 0.668    | 101.5     |
| 11 | 0     | 1.000 | 0.699 | 0.641    | 97.4      |
| 12 | 0     | 1.000 | 0.730 | 0.672    | 102.1     |
| 13 | 10    | 0.000 | 0.729 | 0.671    | 101.9     |
| 14 | 10    | 0.000 | 0.733 | 0.675    | 102.5     |
| 15 | 10    | 0.000 | 0.716 | 0.658    | 99.9      |
| 16 | 10    | 0.010 | 0.719 | 0.661    | 100.4     |
| 17 | 10    | 0.010 | 0.730 | 0.672    | 102.1     |
| 18 | 10    | 0.010 | 0.722 | 0.664    | 100.9     |
| 19 | 10    | 0.100 | 0.721 | 0.663    | 100.7     |
| 20 | 10    | 0.100 | 0.745 | 0.687    | 104.4     |
| 21 | 10    | 0.100 | 0.728 | 0.670    | 101.8     |
| 22 | 10    | 1.000 | 0.721 | 0.663    | 100.7     |
| 23 | 10    | 1.000 | 0.741 | 0.683    | 103.7     |
| 24 | 10    | 1.000 | 0.727 | 0.669    | 101.6     |
