# Supplementary material for: Effects of shinbuto and ninjinto on prostaglandin E 2 production in lipopolysaccharide-treated human gingival fibroblasts
Source: PeerJ journal article supplement (doi:10.7717/peerj.4120), 2017-12-01
Supplement: raw_data_Fig1_2_3_6.zip [file raw_data_Fig1_2_3_6.zip]

- Exp. 6
- Condition
  - drug1: PgLPS (pg/ml)
  - drug2: TJ041 (mg/ml)
  - experimental No. 1
  - treatment: 24h
- Measurement
  - PGE2
  - Date: 2012.7.6
- Cells
  - cells: HGFs (No. 1), passages: 15
  - cell numbers:  $1 \times 10^4$  cells/well =  $5 \times 10^4$  cells/ml

|   | conc.  | OD    |
|---|--------|-------|
| 1 | 7.8    | 0.802 |
| 2 | 15.6   | 0.726 |
| 3 | 31.2   | 0.707 |
| 4 | 62.5   | 0.580 |
| 5 | 125.0  | 0.428 |
| 6 | 250.0  | 0.318 |
| 7 | 500.0  | 0.243 |
| 8 | 1000.0 | 0.191 |

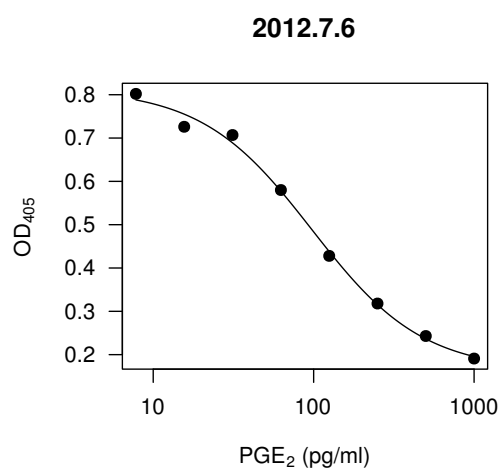

|   | drug1 | drug2 | mean  | SD    |
|---|-------|-------|-------|-------|
| 1 | 0     | 0.000 | 0.024 | 0.014 |
| 2 | 0     | 0.010 | 0.024 | 0.009 |
| 3 | 0     | 0.100 | 0.023 | 0.009 |
| 4 | 0     | 1.000 | 0.028 | 0.007 |
| 5 | 10    | 0.000 | 0.456 | 0.060 |
| 6 | 10    | 0.010 | 0.469 | 0.037 |
| 7 | 10    | 0.100 | 0.449 | 0.073 |
| 8 | 10    | 1.000 | 0.335 | 0.076 |

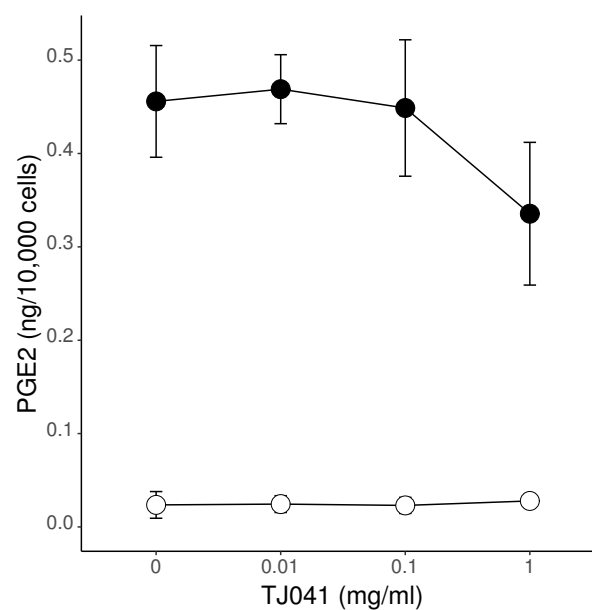

|    | drug1 | drug2 | viability | dilution | OD    | conc. (pg/ml) | net (ng/ml) | (ng/10,000 cells) |
|----|-------|-------|-----------|----------|-------|---------------|-------------|-------------------|
| 1  | 0     | 0.000 | 102.68    | 5        | 0.691 | 30.70         | 0.153       | 0.030             |
| 2  | 0     | 0.000 | 96.30     | 5        | 0.684 | 32.42         | 0.162       | 0.034             |
| 3  | 0     | 0.000 | 101.01    | 5        | 0.790 | 7.30          | 0.037       | 0.007             |
| 4  | 0     | 0.010 | 99.49     | 5        | 0.718 | 24.23         | 0.121       | 0.024             |
| 5  | 0     | 0.010 | 94.94     | 5        | 0.759 | 14.71         | 0.074       | 0.015             |
| 6  | 0     | 0.010 | 99.65     | 5        | 0.680 | 33.41         | 0.167       | 0.034             |
| 7  | 0     | 0.100 | 102.83    | 5        | 0.682 | 32.91         | 0.165       | 0.032             |
| 8  | 0     | 0.100 | 95.85     | 5        | 0.730 | 21.43         | 0.107       | 0.022             |
| 9  | 0     | 0.100 | 99.49     | 5        | 0.759 | 14.71         | 0.074       | 0.015             |
| 10 | 0     | 1.000 | 101.47    | 5        | 0.712 | 25.65         | 0.128       | 0.025             |
| 11 | 0     | 1.000 | 97.37     | 5        | 0.674 | 34.91         | 0.175       | 0.036             |
| 12 | 0     | 1.000 | 102.08    | 5        | 0.724 | 22.83         | 0.114       | 0.022             |
| 13 | 10    | 0.000 | 101.92    | 5        | 0.246 | 447.96        | 2.240       | 0.440             |
| 14 | 10    | 0.000 | 102.53    | 5        | 0.253 | 416.05        | 2.080       | 0.406             |
| 15 | 10    | 0.000 | 99.95     | 5        | 0.233 | 521.83        | 2.609       | 0.522             |
| 16 | 10    | 0.010 | 100.40    | 5        | 0.250 | 429.17        | 2.146       | 0.427             |
| 17 | 10    | 0.010 | 102.08    | 5        | 0.238 | 490.75        | 2.454       | 0.481             |
| 18 | 10    | 0.010 | 100.86    | 5        | 0.236 | 502.73        | 2.514       | 0.498             |
| 19 | 10    | 0.100 | 100.71    | 5        | 0.266 | 367.03        | 1.835       | 0.364             |
| 20 | 10    | 0.100 | 104.35    | 5        | 0.235 | 508.94        | 2.545       | 0.488             |
| 21 | 10    | 0.100 | 101.77    | 5        | 0.236 | 502.73        | 2.514       | 0.494             |
| 22 | 10    | 1.000 | 100.71    | 5        | 0.299 | 280.38        | 1.402       | 0.278             |
| 23 | 10    | 1.000 | 103.75    | 5        | 0.283 | 317.20        | 1.586       | 0.306             |
| 24 | 10    | 1.000 | 101.62    | 5        | 0.250 | 429.17        | 2.146       | 0.422             |
