# Supplementary material for: Effects of shinbuto and ninjinto on prostaglandin E 2 production in lipopolysaccharide-treated human gingival fibroblasts
Source: PeerJ journal article supplement (doi:10.7717/peerj.4120), 2017-12-01
Supplement: raw_data_Fig1_2_3_6.zip [file raw_data_Fig1_2_3_6.zip]

- Exp. 6
- Condition
  - drug1: PgLPS (pg/ml)
  - drug2: TJ030 (mg/ml)
  - experimental No. 1
  - treatment: 24h
- Measurement
  - IL-8
  - Date: 2012.11.5
- Cells
  - cells: HGFs (No. 1), passages: 15
  - cell numbers:  $1 \times 10^4$  cells/well =  $5 \times 10^4$  cells/ml

|   | conc.  | OD    | OD-blank |
|---|--------|-------|----------|
| 1 | 0.0    | 0.053 | 0.000    |
| 2 | 15.6   | 0.092 | 0.039    |
| 3 | 31.2   | 0.120 | 0.067    |
| 4 | 62.5   | 0.188 | 0.135    |
| 5 | 125.0  | 0.295 | 0.242    |
| 6 | 250.0  | 0.493 | 0.440    |
| 7 | 500.0  | 0.793 | 0.740    |
| 8 | 1000.0 | 1.079 | 1.026    |

|   | drug1 | drug2 | mean  | SD    |
|---|-------|-------|-------|-------|
| 1 | 0     | 0.000 | 0.070 | 0.012 |
| 2 | 0     | 0.010 | 0.032 | 0.015 |
| 3 | 0     | 0.100 | 0.020 | 0.011 |
| 4 | 0     | 1.000 | 0.051 | 0.005 |
| 5 | 10    | 0.000 | 3.520 | 0.395 |
| 6 | 10    | 0.010 | 3.678 | 0.149 |
| 7 | 10    | 0.100 | 3.396 | 0.113 |
| 8 | 10    | 1.000 | 3.398 | 0.118 |

2012.11.5

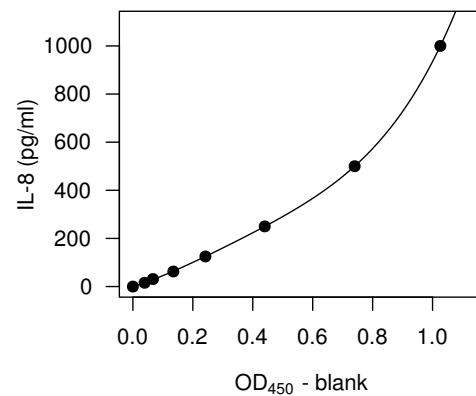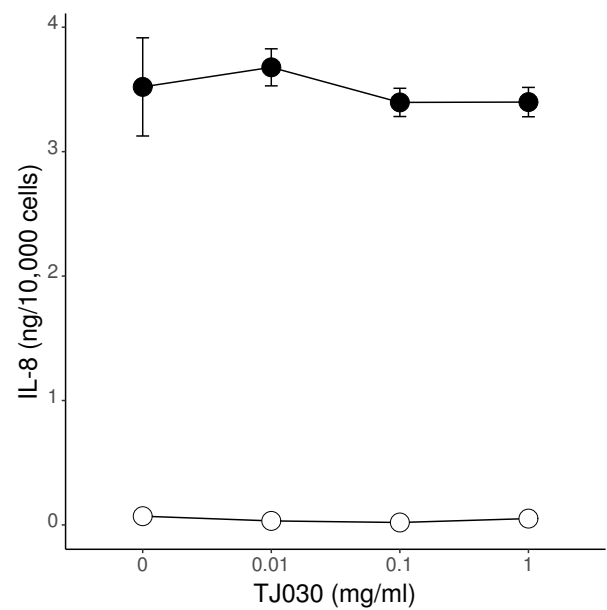

|    | drug1 | drug2 | viability | dilution | OD    | conc. (pg/ml) | net (ng/ml) | (ng/10,000 cells) |
|----|-------|-------|-----------|----------|-------|---------------|-------------|-------------------|
| 1  | 0     | 0.000 | 103.12    | 50       | 0.071 | 7.14          | 0.357       | 0.069             |
| 2  | 0     | 0.000 | 96.10     | 50       | 0.073 | 7.96          | 0.398       | 0.083             |
| 3  | 0     | 0.000 | 100.78    | 50       | 0.068 | 5.91          | 0.296       | 0.059             |
| 4  | 0     | 0.010 | 103.41    | 50       | 0.066 | 5.10          | 0.255       | 0.049             |
| 5  | 0     | 0.010 | 96.10     | 50       | 0.059 | 2.32          | 0.116       | 0.024             |
| 6  | 0     | 0.010 | 98.59     | 50       | 0.059 | 2.32          | 0.116       | 0.024             |
| 7  | 0     | 0.100 | 104.29    | 50       | 0.055 | 0.77          | 0.038       | 0.007             |
| 8  | 0     | 0.100 | 96.54     | 50       | 0.059 | 2.32          | 0.116       | 0.024             |
| 9  | 0     | 0.100 | 98.73     | 50       | 0.060 | 2.71          | 0.136       | 0.027             |
| 10 | 0     | 1.000 | 102.39    | 50       | 0.065 | 4.70          | 0.235       | 0.046             |
| 11 | 0     | 1.000 | 96.98     | 50       | 0.066 | 5.10          | 0.255       | 0.053             |
| 12 | 0     | 1.000 | 101.07    | 50       | 0.067 | 5.51          | 0.275       | 0.054             |
| 13 | 10    | 0.000 | 100.93    | 50       | 0.579 | 309.46        | 15.473      | 3.066             |
| 14 | 10    | 0.000 | 101.66    | 50       | 0.674 | 384.00        | 19.200      | 3.777             |
| 15 | 10    | 0.000 | 99.90     | 50       | 0.659 | 371.40        | 18.570      | 3.718             |
| 16 | 10    | 0.010 | 98.59     | 50       | 0.646 | 360.77        | 18.039      | 3.659             |
| 17 | 10    | 0.010 | 99.03     | 50       | 0.669 | 379.76        | 18.988      | 3.835             |
| 18 | 10    | 0.010 | 99.46     | 50       | 0.635 | 351.96        | 17.598      | 3.539             |
| 19 | 10    | 0.100 | 98.00     | 50       | 0.611 | 333.31        | 16.665      | 3.401             |
| 20 | 10    | 0.100 | 103.12    | 50       | 0.647 | 361.58        | 18.079      | 3.506             |
| 21 | 10    | 0.100 | 99.32     | 50       | 0.601 | 325.74        | 16.287      | 3.280             |
| 22 | 10    | 1.000 | 99.03     | 50       | 0.603 | 327.24        | 16.362      | 3.304             |
| 23 | 10    | 1.000 | 101.95    | 50       | 0.645 | 359.96        | 17.998      | 3.531             |
| 24 | 10    | 1.000 | 100.34    | 50       | 0.616 | 337.13        | 16.857      | 3.360             |
