# Supplementary material for: Effects of shinbuto and ninjinto on prostaglandin E 2 production in lipopolysaccharide-treated human gingival fibroblasts
Source: PeerJ journal article supplement (doi:10.7717/peerj.4120), 2017-12-01
Supplement: raw_data_Fig1_2_3_6.zip [file raw_data_Fig1_2_3_6.zip]

|    | drug  | LPS | dose   | mean   | sd   |
|----|-------|-----|--------|--------|------|
| 1  | TJ032 | 0   | 0.000  | 100.00 | 2.90 |
| 2  | TJ032 | 0   | 0.500  | 99.72  | 4.37 |
| 3  | TJ032 | 0   | 1.000  | 98.67  | 3.73 |
| 4  | TJ032 | 0   | 2.000  | 99.12  | 6.55 |
| 5  | TJ032 | 0   | 5.000  | 87.61  | 7.10 |
| 6  | TJ032 | 0   | 10.000 | 78.25  | 3.27 |
| 7  | TJ032 | 10  | 0.000  | 97.38  | 9.63 |
| 8  | TJ032 | 10  | 0.500  | 99.70  | 1.73 |
| 9  | TJ032 | 10  | 1.000  | 103.17 | 1.06 |
| 10 | TJ032 | 10  | 2.000  | 102.51 | 5.91 |
| 11 | TJ032 | 10  | 5.000  | 96.60  | 8.81 |
| 12 | TJ032 | 10  | 10.000 | 80.10  | 4.38 |

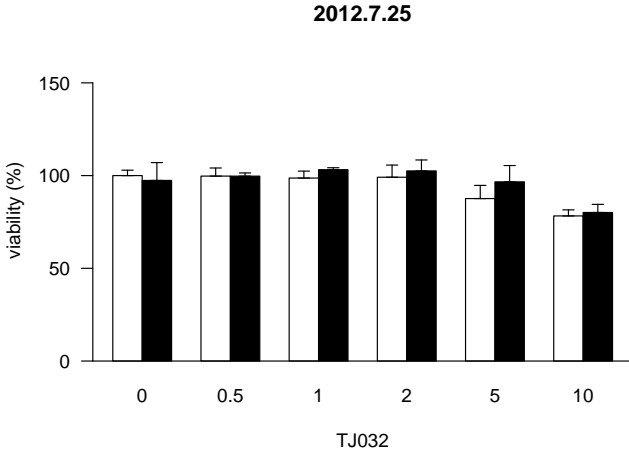

- cells: HGFs (No. 2)
- passages: 8
- cell numbers:  $0.5 \times 10^4$  cells/well
- LPS: PgLPS (10 ng/ml), treatment: 24h

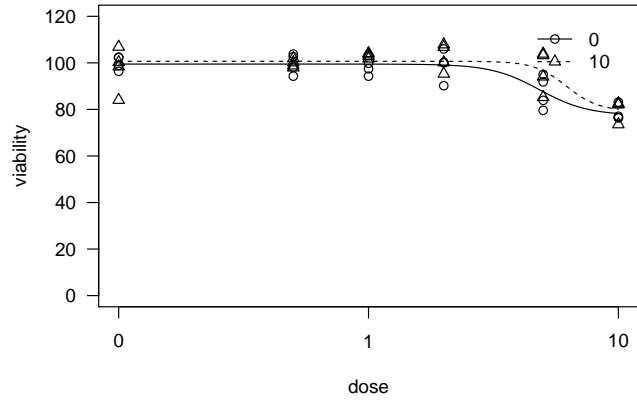

|       | Estimate | Std. Error | Lower | Upper |
|-------|----------|------------|-------|-------|
| 0:50  | 4.83     | 0.73       | 3.35  | 6.31  |
| 10:50 | 6.19     | 5.04       | -3.99 | 16.37 |

|   | drug  | OD    | mean  |
|---|-------|-------|-------|
| 1 | blank | 0.093 | 0.086 |
| 2 | blank | 0.080 |       |
| 3 | blank | 0.086 |       |
| 4 | blank | 0.084 |       |
| 5 | blank | 0.085 |       |
| 6 | blank | 0.086 |       |
| 7 | blank | 0.104 |       |
| 8 | blank | 0.071 |       |

|    | drug  | LPS | dose   | OD    | viability |
|----|-------|-----|--------|-------|-----------|
| 1  | TJ032 | 0   | 0.000  | 0.873 | 96.4      |
| 2  | TJ032 | 0   | 0.000  | 0.896 | 98.9      |
| 3  | TJ032 | 0   | 0.000  | 0.926 | 102.2     |
| 4  | TJ032 | 0   | 0.000  | 0.928 | 102.5     |
| 5  | TJ032 | 0   | 0.500  | 0.854 | 94.3      |
| 6  | TJ032 | 0   | 0.500  | 0.940 | 103.8     |
| 7  | TJ032 | 0   | 0.500  | 0.930 | 102.7     |
| 8  | TJ032 | 0   | 0.500  | 0.889 | 98.2      |
| 9  | TJ032 | 0   | 1.000  | 0.934 | 103.1     |
| 10 | TJ032 | 0   | 1.000  | 0.904 | 99.8      |
| 11 | TJ032 | 0   | 1.000  | 0.854 | 94.3      |
| 12 | TJ032 | 0   | 1.000  | 0.883 | 97.5      |
| 13 | TJ032 | 0   | 2.000  | 0.817 | 90.2      |
| 14 | TJ032 | 0   | 2.000  | 0.960 | 106.0     |
| 15 | TJ032 | 0   | 2.000  | 0.906 | 100.0     |
| 16 | TJ032 | 0   | 2.000  | 0.908 | 100.2     |
| 17 | TJ032 | 0   | 5.000  | 0.721 | 79.6      |
| 18 | TJ032 | 0   | 5.000  | 0.760 | 83.9      |
| 19 | TJ032 | 0   | 5.000  | 0.832 | 91.9      |
| 20 | TJ032 | 0   | 5.000  | 0.861 | 95.1      |
| 21 | TJ032 | 0   | 10.000 | 0.692 | 76.4      |
| 22 | TJ032 | 0   | 10.000 | 0.692 | 76.4      |
| 23 | TJ032 | 0   | 10.000 | 0.753 | 83.1      |
| 24 | TJ032 | 0   | 10.000 | 0.698 | 77.1      |
| 25 | TJ032 | 10  | 0.000  | 0.968 | 106.9     |
| 26 | TJ032 | 10  | 0.000  | 0.761 | 84.0      |
| 27 | TJ032 | 10  | 0.000  | 0.908 | 100.2     |
| 28 | TJ032 | 10  | 0.000  | 0.891 | 98.4      |
| 29 | TJ032 | 10  | 0.500  | 0.923 | 101.9     |
| 30 | TJ032 | 10  | 0.500  | 0.907 | 100.1     |
| 31 | TJ032 | 10  | 0.500  | 0.895 | 98.8      |
| 32 | TJ032 | 10  | 0.500  | 0.887 | 97.9      |
| 33 | TJ032 | 10  | 1.000  | 0.932 | 102.9     |
| 34 | TJ032 | 10  | 1.000  | 0.943 | 104.1     |
| 35 | TJ032 | 10  | 1.000  | 0.941 | 103.9     |
| 36 | TJ032 | 10  | 1.000  | 0.922 | 101.8     |
| 37 | TJ032 | 10  | 2.000  | 0.967 | 106.8     |
| 38 | TJ032 | 10  | 2.000  | 0.907 | 100.1     |
| 39 | TJ032 | 10  | 2.000  | 0.977 | 107.9     |
| 40 | TJ032 | 10  | 2.000  | 0.863 | 95.3      |
| 41 | TJ032 | 10  | 5.000  | 0.935 | 103.2     |
| 42 | TJ032 | 10  | 5.000  | 0.852 | 94.1      |
| 43 | TJ032 | 10  | 5.000  | 0.941 | 103.9     |
| 44 | TJ032 | 10  | 5.000  | 0.772 | 85.2      |
| 45 | TJ032 | 10  | 10.000 | 0.744 | 82.1      |
| 46 | TJ032 | 10  | 10.000 | 0.744 | 82.1      |
| 47 | TJ032 | 10  | 10.000 | 0.748 | 82.6      |
| 48 | TJ032 | 10  | 10.000 | 0.666 | 73.5      |
