# Supplementary material for: Effects of shinbuto and ninjinto on prostaglandin E 2 production in lipopolysaccharide-treated human gingival fibroblasts
Source: PeerJ journal article supplement (doi:10.7717/peerj.4120), 2017-12-01
Supplement: raw_data_Fig1_2_3_6.zip [file raw_data_Fig1_2_3_6.zip]

- Exp. 6
- Condition
  - drug1: PgLPS (pg/ml)
  - drug2: TJ029 (mg/ml)
  - experimental No. 1
  - treatment: 24h
- Measurement
  - IL-8
  - Date: 2012.11.5
- Cells
  - cells: HGFs (No. 1), passages: 15
  - cell numbers:  $1 \times 10^4$  cells/well =  $5 \times 10^4$  cells/ml

|   | conc.  | OD    | OD-blank |
|---|--------|-------|----------|
| 1 | 0.0    | 0.053 | 0.000    |
| 2 | 15.6   | 0.092 | 0.039    |
| 3 | 31.2   | 0.120 | 0.067    |
| 4 | 62.5   | 0.188 | 0.135    |
| 5 | 125.0  | 0.295 | 0.242    |
| 6 | 250.0  | 0.493 | 0.440    |
| 7 | 500.0  | 0.793 | 0.740    |
| 8 | 1000.0 | 1.079 | 1.026    |

|   | drug1 | drug2 | mean  | SD    |
|---|-------|-------|-------|-------|
| 1 | 0     | 0.000 | 0.009 | 0.008 |
| 2 | 0     | 0.010 | 0.004 | 0.004 |
| 3 | 0     | 0.100 | 0.002 | 0.004 |
| 4 | 0     | 1.000 | 0.005 | 0.009 |
| 5 | 10    | 0.000 | 3.942 | 0.421 |
| 6 | 10    | 0.010 | 4.014 | 0.147 |
| 7 | 10    | 0.100 | 4.409 | 0.422 |
| 8 | 10    | 1.000 | 4.547 | 0.237 |

2012.11.5

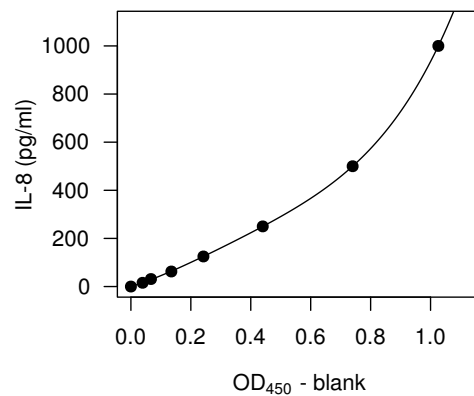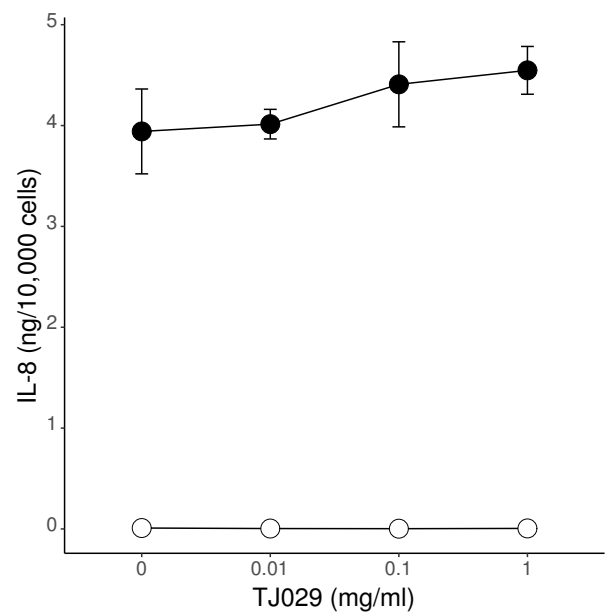

|    | drug1 | drug2 | viability | dilution | OD    | conc. (pg/ml) | net (ng/ml) | (ng/10,000 cells) |
|----|-------|-------|-----------|----------|-------|---------------|-------------|-------------------|
| 1  | 0     | 0.000 | 103.89    | 50       | 0.057 | 1.54          | 0.077       | 0.015             |
| 2  | 0     | 0.000 | 95.67     | 50       | 0.056 | 1.15          | 0.058       | 0.012             |
| 3  | 0     | 0.000 | 100.43    | 50       | 0.053 | 0.00          | 0.000       | 0.000             |
| 4  | 0     | 0.010 | 104.18    | 50       | 0.053 | 0.00          | 0.000       | 0.000             |
| 5  | 0     | 0.010 | 96.68     | 50       | 0.054 | 0.38          | 0.019       | 0.004             |
| 6  | 0     | 0.010 | 99.28     | 50       | 0.055 | 0.77          | 0.038       | 0.008             |
| 7  | 0     | 0.100 | 104.04    | 50       | 0.055 | 0.77          | 0.038       | 0.007             |
| 8  | 0     | 0.100 | 95.67     | 50       | 0.053 | 0.00          | 0.000       | 0.000             |
| 9  | 0     | 0.100 | 98.85     | 50       | 0.053 | 0.00          | 0.000       | 0.000             |
| 10 | 0     | 1.000 | 101.15    | 50       | 0.053 | 0.00          | 0.000       | 0.000             |
| 11 | 0     | 1.000 | 96.54     | 50       | 0.053 | 0.00          | 0.000       | 0.000             |
| 12 | 0     | 1.000 | 100.43    | 50       | 0.057 | 1.54          | 0.077       | 0.015             |
| 13 | 10    | 0.000 | 100.14    | 50       | 0.696 | 403.17        | 20.158      | 4.026             |
| 14 | 10    | 0.000 | 101.44    | 50       | 0.637 | 353.55        | 17.678      | 3.485             |
| 15 | 10    | 0.000 | 99.42     | 50       | 0.724 | 428.90        | 21.445      | 4.314             |
| 16 | 10    | 0.010 | 98.13     | 50       | 0.696 | 403.17        | 20.158      | 4.108             |
| 17 | 10    | 0.010 | 99.71     | 50       | 0.701 | 407.65        | 20.382      | 4.088             |
| 18 | 10    | 0.010 | 98.99     | 50       | 0.670 | 380.60        | 19.030      | 3.845             |
| 19 | 10    | 0.100 | 100.29    | 50       | 0.694 | 401.39        | 20.069      | 4.002             |
| 20 | 10    | 0.100 | 101.01    | 50       | 0.738 | 442.39        | 22.119      | 4.380             |
| 21 | 10    | 0.100 | 98.27     | 50       | 0.771 | 476.04        | 23.802      | 4.844             |
| 22 | 10    | 1.000 | 98.99     | 50       | 0.772 | 477.11        | 23.855      | 4.820             |
| 23 | 10    | 1.000 | 102.16    | 50       | 0.744 | 448.31        | 22.415      | 4.388             |
| 24 | 10    | 1.000 | 100.43    | 50       | 0.741 | 445.34        | 22.267      | 4.434             |
