# Supplementary material for: Effects of shinbuto and ninjinto on prostaglandin E 2 production in lipopolysaccharide-treated human gingival fibroblasts
Source: PeerJ journal article supplement (doi:10.7717/peerj.4120), 2017-12-01
Supplement: raw_data_Fig1_2_3_6.zip [file raw_data_Fig1_2_3_6.zip]

- Exp. 6
- Condition
  - drug1: PgLPS (pg/ml)
  - drug2: TJ029 (mg/ml)
  - experimental No. 1
  - treatment: 24h
- Measurement
  - PGE2
  - Date: 2012.7.6
- Cells
  - cells: HGFs (No. 1), passages: 15
  - cell numbers:  $1 \times 10^4$  cells/well =  $5 \times 10^4$  cells/ml

|   | conc.  | OD    |
|---|--------|-------|
| 1 | 7.8    | 0.757 |
| 2 | 15.6   | 0.673 |
| 3 | 31.2   | 0.542 |
| 4 | 62.5   | 0.465 |
| 5 | 125.0  | 0.316 |
| 6 | 250.0  | 0.239 |
| 7 | 500.0  | 0.191 |
| 8 | 1000.0 | 0.170 |

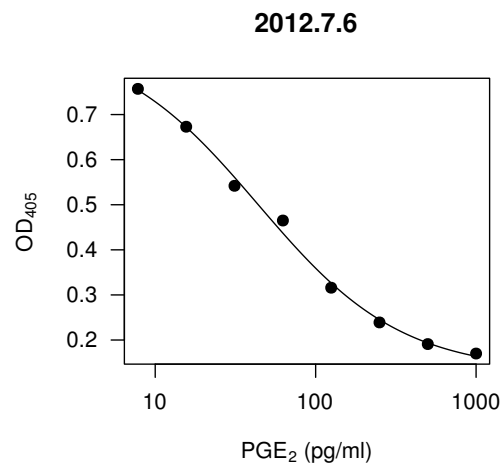

|   | drug1 | drug2 | mean  | SD    |
|---|-------|-------|-------|-------|
| 1 | 0     | 0.000 | 0.029 | 0.002 |
| 2 | 0     | 0.010 | 0.028 | 0.007 |
| 3 | 0     | 0.100 | 0.027 | 0.002 |
| 4 | 0     | 1.000 | 0.033 | 0.003 |
| 5 | 10    | 0.000 | 0.414 | 0.151 |
| 6 | 10    | 0.010 | 0.474 | 0.084 |
| 7 | 10    | 0.100 | 0.420 | 0.059 |
| 8 | 10    | 1.000 | 0.430 | 0.021 |

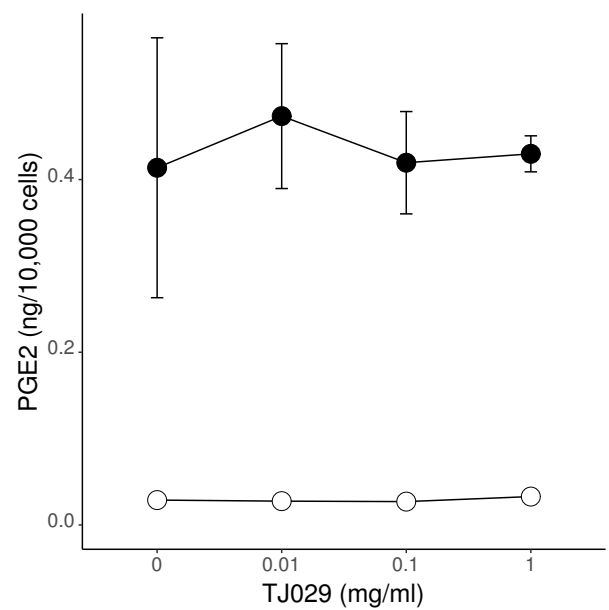

|    | drug1 | drug2 | viability | dilution | OD    | conc. (pg/ml) | net (ng/ml) | (ng/10,000 cells) |
|----|-------|-------|-----------|----------|-------|---------------|-------------|-------------------|
| 1  | 0     | 0.000 | 103.89    | 5        | 0.570 | 29.61         | 0.148       | 0.029             |
| 2  | 0     | 0.000 | 95.67     | 5        | 0.569 | 29.78         | 0.149       | 0.031             |
| 3  | 0     | 0.000 | 100.43    | 5        | 0.587 | 26.83         | 0.134       | 0.027             |
| 4  | 0     | 0.010 | 104.18    | 5        | 0.634 | 20.14         | 0.101       | 0.019             |
| 5  | 0     | 0.010 | 96.68     | 5        | 0.560 | 31.36         | 0.157       | 0.032             |
| 6  | 0     | 0.010 | 99.28     | 5        | 0.564 | 30.65         | 0.153       | 0.031             |
| 7  | 0     | 0.100 | 104.04    | 5        | 0.595 | 25.59         | 0.128       | 0.025             |
| 8  | 0     | 0.100 | 95.67     | 5        | 0.584 | 27.30         | 0.137       | 0.029             |
| 9  | 0     | 0.100 | 98.85     | 5        | 0.582 | 27.62         | 0.138       | 0.028             |
| 10 | 0     | 1.000 | 101.15    | 5        | 0.534 | 36.32         | 0.182       | 0.036             |
| 11 | 0     | 1.000 | 96.54     | 5        | 0.559 | 31.54         | 0.158       | 0.033             |
| 12 | 0     | 1.000 | 100.43    | 5        | 0.567 | 30.13         | 0.151       | 0.030             |
| 13 | 10    | 0.000 | 100.14    | 5        | 0.187 | 564.56        | 2.823       | 0.564             |
| 14 | 10    | 0.000 | 101.44    | 5        | 0.204 | 420.51        | 2.103       | 0.415             |
| 15 | 10    | 0.000 | 99.42     | 5        | 0.241 | 261.23        | 1.306       | 0.263             |
| 16 | 10    | 0.010 | 98.13     | 5        | 0.204 | 420.51        | 2.103       | 0.429             |
| 17 | 10    | 0.010 | 99.71     | 5        | 0.204 | 420.51        | 2.103       | 0.422             |
| 18 | 10    | 0.010 | 98.99     | 5        | 0.187 | 564.56        | 2.823       | 0.570             |
| 19 | 10    | 0.100 | 100.29    | 5        | 0.202 | 433.87        | 2.169       | 0.433             |
| 20 | 10    | 0.100 | 101.01    | 5        | 0.215 | 358.42        | 1.792       | 0.355             |
| 21 | 10    | 0.100 | 98.27     | 5        | 0.198 | 462.99        | 2.315       | 0.471             |
| 22 | 10    | 1.000 | 98.99     | 5        | 0.200 | 448.01        | 2.240       | 0.453             |
| 23 | 10    | 1.000 | 102.16    | 5        | 0.204 | 420.51        | 2.103       | 0.412             |
| 24 | 10    | 1.000 | 100.43    | 5        | 0.203 | 427.09        | 2.135       | 0.425             |
