# Supplementary material for: Effects of shinbuto and ninjinto on prostaglandin E 2 production in lipopolysaccharide-treated human gingival fibroblasts
Source: PeerJ journal article supplement (doi:10.7717/peerj.4120), 2017-12-01
Supplement: raw_data_Fig1_2_3_6.zip [file raw_data_Fig1_2_3_6.zip]

- Exp. 6
- Condition
  - drug1: PgLPS (pg/ml)
  - drug2: TJ041 (mg/ml)
  - experimental No. 1
  - treatment: 24h
- Measurement
  - IL-6
  - Date: 2013.11.1
- Cells
  - cells: HGFs (No. 1), passages: 15
  - cell numbers:  $1 \times 10^4$  cells/well =  $5 \times 10^4$  cells/ml

|   | conc. | OD    | OD-blank |
|---|-------|-------|----------|
| 1 | 0     | 0.063 | 0.000    |
| 2 | 125   | 0.220 | 0.157    |
| 3 | 250   | 0.318 | 0.255    |
| 4 | 500   | 0.492 | 0.429    |
| 5 | 1000  | 0.919 | 0.856    |

|   | drug1 | drug2 | mean  | SD    |
|---|-------|-------|-------|-------|
| 1 | 0     | 0.000 | 0.009 | 0.001 |
| 2 | 0     | 0.010 | 0.008 | 0.001 |
| 3 | 0     | 0.100 | 0.010 | 0.002 |
| 4 | 0     | 1.000 | 0.017 | 0.004 |
| 5 | 10    | 0.000 | 1.122 | 0.066 |
| 6 | 10    | 0.010 | 1.539 | 0.093 |
| 7 | 10    | 0.100 | 1.750 | 0.119 |
| 8 | 10    | 1.000 | 1.776 | 0.226 |

**2013.11.1**

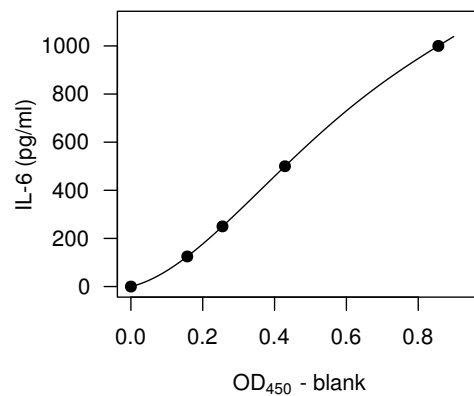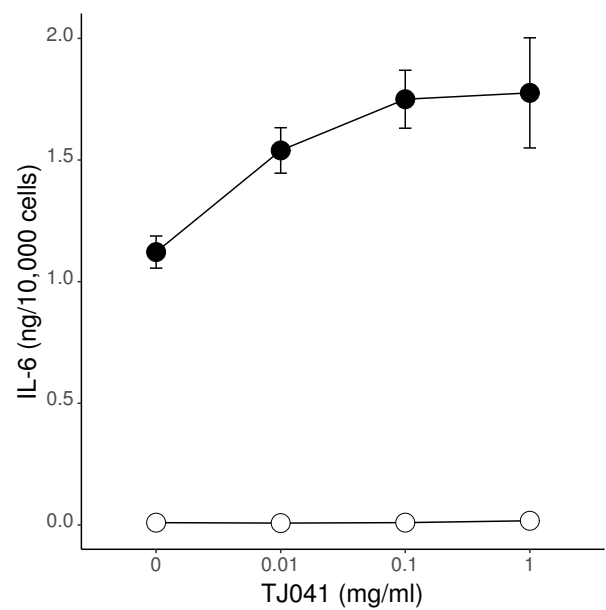

|    | drug1 | drug2 | viability | dilution | OD    | conc. (pg/ml) | net (ng/ml) | (ng/10,000 cells) |
|----|-------|-------|-----------|----------|-------|---------------|-------------|-------------------|
| 1  | 0     | 0.000 | 102.68    | 10       | 0.076 | 5.14          | 0.051       | 0.010             |
| 2  | 0     | 0.000 | 96.30     | 10       | 0.073 | 3.85          | 0.039       | 0.008             |
| 3  | 0     | 0.000 | 101.01    | 10       | 0.076 | 5.14          | 0.051       | 0.010             |
| 4  | 0     | 0.010 | 99.49     | 10       | 0.072 | 3.43          | 0.034       | 0.007             |
| 5  | 0     | 0.010 | 94.94     | 10       | 0.072 | 3.43          | 0.034       | 0.007             |
| 6  | 0     | 0.010 | 99.65     | 10       | 0.074 | 4.27          | 0.043       | 0.009             |
| 7  | 0     | 0.100 | 102.83    | 10       | 0.073 | 3.85          | 0.039       | 0.007             |
| 8  | 0     | 0.100 | 95.85     | 10       | 0.076 | 5.14          | 0.051       | 0.011             |
| 9  | 0     | 0.100 | 99.49     | 10       | 0.076 | 5.14          | 0.051       | 0.010             |
| 10 | 0     | 1.000 | 101.47    | 10       | 0.079 | 6.49          | 0.065       | 0.013             |
| 11 | 0     | 1.000 | 97.37     | 10       | 0.087 | 10.37         | 0.104       | 0.021             |
| 12 | 0     | 1.000 | 102.08    | 10       | 0.084 | 8.86          | 0.089       | 0.017             |
| 13 | 10    | 0.000 | 101.92    | 10       | 0.547 | 577.67        | 5.777       | 1.134             |
| 14 | 10    | 0.000 | 102.53    | 10       | 0.519 | 538.46        | 5.385       | 1.050             |
| 15 | 10    | 0.000 | 99.95     | 10       | 0.556 | 590.11        | 5.901       | 1.181             |
| 16 | 10    | 0.010 | 100.40    | 10       | 0.710 | 786.35        | 7.863       | 1.566             |
| 17 | 10    | 0.010 | 102.08    | 10       | 0.744 | 824.95        | 8.249       | 1.616             |
| 18 | 10    | 0.010 | 100.86    | 10       | 0.658 | 723.91        | 7.239       | 1.435             |
| 19 | 10    | 0.100 | 100.71    | 10       | 0.770 | 853.31        | 8.533       | 1.695             |
| 20 | 10    | 0.100 | 104.35    | 10       | 0.902 | 984.28        | 9.843       | 1.886             |
| 21 | 10    | 0.100 | 101.77    | 10       | 0.766 | 849.01        | 8.490       | 1.668             |
| 22 | 10    | 1.000 | 100.71    | 10       | 0.894 | 976.82        | 9.768       | 1.940             |
| 23 | 10    | 1.000 | 103.75    | 10       | 0.887 | 970.26        | 9.703       | 1.870             |
| 24 | 10    | 1.000 | 101.62    | 10       | 0.697 | 771.12        | 7.711       | 1.518             |
