# Supplementary material for: Effects of shinbuto and ninjinto on prostaglandin E 2 production in lipopolysaccharide-treated human gingival fibroblasts
Source: PeerJ journal article supplement (doi:10.7717/peerj.4120), 2017-12-01
Supplement: raw_data_Fig1_2_3_6.zip [file raw_data_Fig1_2_3_6.zip]

- Exp. 6
- Condition
  - drug1: PgLPS (pg/ml)
  - drug2: TJ032 (mg/ml)
  - experimental No. 1
  - treatment: 24h
- Measurement
  - WST-8
  - Date: 2012.7.5
- Cells
  - cells: HGFs (No. 1), passages: 15
  - cell numbers:  $1 \times 10^4$  cells/well

|   | drug1 | drug2 | mean  | SD  |
|---|-------|-------|-------|-----|
| 1 | 0     | 0.000 | 100.0 | 2.9 |
| 2 | 0     | 0.010 | 99.4  | 3.7 |
| 3 | 0     | 0.100 | 101.1 | 3.4 |
| 4 | 0     | 1.000 | 101.8 | 2.4 |
| 5 | 10    | 0.000 | 103.4 | 0.8 |
| 6 | 10    | 0.010 | 103.8 | 1.2 |
| 7 | 10    | 0.100 | 102.3 | 0.9 |
| 8 | 10    | 1.000 | 103.0 | 1.3 |

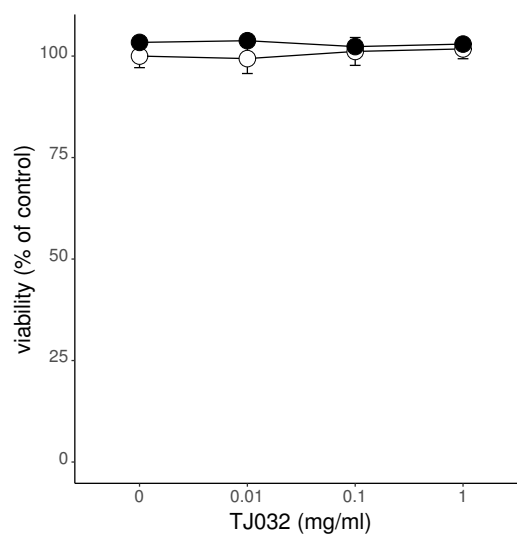

|   | OD    | mean  |
|---|-------|-------|
| 1 | 0.056 | 0.056 |
| 2 | 0.047 |       |
| 3 | 0.053 |       |
| 4 | 0.053 |       |
| 5 | 0.054 |       |
| 6 | 0.071 |       |
| 7 | 0.058 |       |
| 8 | 0.054 |       |

|    | drug1 | drug2 | OD    | OD-blank | viability |
|----|-------|-------|-------|----------|-----------|
| 1  | 0     | 0.000 | 0.713 | 0.657    | 102.2     |
| 2  | 0     | 0.000 | 0.678 | 0.622    | 96.8      |
| 3  | 0     | 0.000 | 0.705 | 0.649    | 101.0     |
| 4  | 0     | 0.010 | 0.713 | 0.657    | 102.2     |
| 5  | 0     | 0.010 | 0.668 | 0.612    | 95.2      |
| 6  | 0     | 0.010 | 0.703 | 0.647    | 100.7     |
| 7  | 0     | 0.100 | 0.727 | 0.671    | 104.4     |
| 8  | 0     | 0.100 | 0.683 | 0.627    | 97.6      |
| 9  | 0     | 0.100 | 0.708 | 0.652    | 101.5     |
| 10 | 0     | 1.000 | 0.725 | 0.669    | 104.1     |
| 11 | 0     | 1.000 | 0.694 | 0.638    | 99.3      |
| 12 | 0     | 1.000 | 0.711 | 0.655    | 101.9     |
| 13 | 10    | 0.000 | 0.719 | 0.663    | 103.2     |
| 14 | 10    | 0.000 | 0.726 | 0.670    | 104.3     |
| 15 | 10    | 0.000 | 0.716 | 0.660    | 102.7     |
| 16 | 10    | 0.010 | 0.732 | 0.676    | 105.2     |
| 17 | 10    | 0.010 | 0.718 | 0.662    | 103.0     |
| 18 | 10    | 0.010 | 0.719 | 0.663    | 103.2     |
| 19 | 10    | 0.100 | 0.710 | 0.654    | 101.8     |
| 20 | 10    | 0.100 | 0.720 | 0.664    | 103.3     |
| 21 | 10    | 0.100 | 0.711 | 0.655    | 101.9     |
| 22 | 10    | 1.000 | 0.709 | 0.653    | 101.6     |
| 23 | 10    | 1.000 | 0.726 | 0.670    | 104.3     |
| 24 | 10    | 1.000 | 0.718 | 0.662    | 103.0     |
