# Supplementary material for: Effects of shinbuto and ninjinto on prostaglandin E 2 production in lipopolysaccharide-treated human gingival fibroblasts
Source: PeerJ journal article supplement (doi:10.7717/peerj.4120), 2017-12-01
Supplement: raw_data_Fig1_2_3_6.zip [file raw_data_Fig1_2_3_6.zip]

- Exp. 6
- Condition
  - drug1: PgLPS (pg/ml)
  - drug2: TJ030 (mg/ml)
  - experimental No. 1
  - treatment: 24h
- Measurement
  - PGE2
  - Date: 2012.7.6
- Cells
  - cells: HGFs (No. 1), passages: 15
  - cell numbers:  $1 \times 10^4$  cells/well =  $5 \times 10^4$  cells/ml

|   | conc.  | OD    |
|---|--------|-------|
| 1 | 7.8    | 0.757 |
| 2 | 15.6   | 0.673 |
| 3 | 31.2   | 0.542 |
| 4 | 62.5   | 0.465 |
| 5 | 125.0  | 0.316 |
| 6 | 250.0  | 0.239 |
| 7 | 500.0  | 0.191 |
| 8 | 1000.0 | 0.170 |

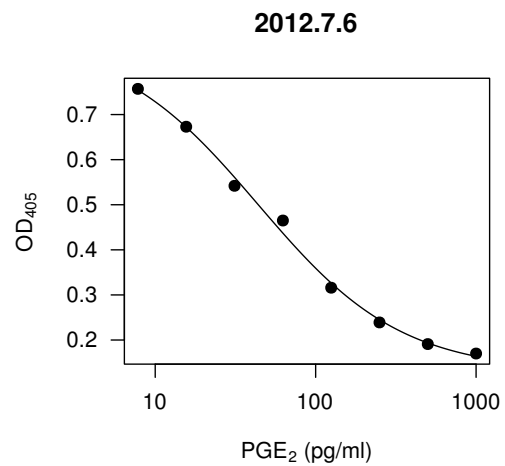

|   | drug1 | drug2 | mean  | SD    |
|---|-------|-------|-------|-------|
| 1 | 0     | 0.000 | 0.036 | 0.010 |
| 2 | 0     | 0.010 | 0.037 | 0.011 |
| 3 | 0     | 0.100 | 0.025 | 0.002 |
| 4 | 0     | 1.000 | 0.025 | 0.005 |
| 5 | 10    | 0.000 | 0.467 | 0.095 |
| 6 | 10    | 0.010 | 0.463 | 0.020 |
| 7 | 10    | 0.100 | 0.378 | 0.098 |
| 8 | 10    | 1.000 | 0.125 | 0.032 |

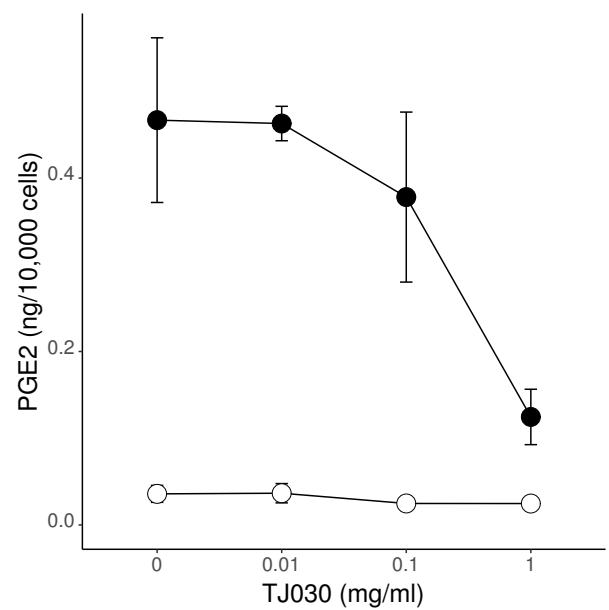

|    | drug1 | drug2 | viability | dilution | OD    | conc. (pg/ml) | net (ng/ml) | (ng/10,000 cells) |
|----|-------|-------|-----------|----------|-------|---------------|-------------|-------------------|
| 1  | 0     | 0.000 | 103.12    | 5        | 0.574 | 28.94         | 0.145       | 0.028             |
| 2  | 0     | 0.000 | 96.10     | 5        | 0.560 | 31.36         | 0.157       | 0.033             |
| 3  | 0     | 0.000 | 100.78    | 5        | 0.487 | 47.17         | 0.236       | 0.047             |
| 4  | 0     | 0.010 | 103.41    | 5        | 0.601 | 24.69         | 0.123       | 0.024             |
| 5  | 0     | 0.010 | 96.10     | 5        | 0.504 | 42.92         | 0.215       | 0.045             |
| 6  | 0     | 0.010 | 98.59     | 5        | 0.514 | 40.60         | 0.203       | 0.041             |
| 7  | 0     | 0.100 | 104.29    | 5        | 0.611 | 23.24         | 0.116       | 0.022             |
| 8  | 0     | 0.100 | 96.54     | 5        | 0.605 | 24.10         | 0.121       | 0.025             |
| 9  | 0     | 0.100 | 98.73     | 5        | 0.588 | 26.67         | 0.133       | 0.027             |
| 10 | 0     | 1.000 | 102.39    | 5        | 0.613 | 22.96         | 0.115       | 0.022             |
| 11 | 0     | 1.000 | 96.98     | 5        | 0.568 | 29.95         | 0.150       | 0.031             |
| 12 | 0     | 1.000 | 101.07    | 5        | 0.628 | 20.92         | 0.105       | 0.021             |
| 13 | 10    | 0.000 | 100.93    | 5        | 0.205 | 414.10        | 2.070       | 0.410             |
| 14 | 10    | 0.000 | 101.66    | 5        | 0.204 | 420.51        | 2.103       | 0.414             |
| 15 | 10    | 0.000 | 99.90     | 5        | 0.186 | 575.81        | 2.879       | 0.576             |
| 16 | 10    | 0.010 | 98.59     | 5        | 0.196 | 478.90        | 2.395       | 0.486             |
| 17 | 10    | 0.010 | 99.03     | 5        | 0.200 | 448.01        | 2.240       | 0.452             |
| 18 | 10    | 0.010 | 99.46     | 5        | 0.200 | 448.01        | 2.240       | 0.450             |
| 19 | 10    | 0.100 | 98.00     | 5        | 0.239 | 267.03        | 1.335       | 0.272             |
| 20 | 10    | 0.100 | 103.12    | 5        | 0.206 | 407.86        | 2.039       | 0.396             |
| 21 | 10    | 0.100 | 99.32     | 5        | 0.198 | 462.99        | 2.315       | 0.466             |
| 22 | 10    | 1.000 | 99.03     | 5        | 0.370 | 93.33         | 0.467       | 0.094             |
| 23 | 10    | 1.000 | 101.95    | 5        | 0.293 | 160.99        | 0.805       | 0.158             |
| 24 | 10    | 1.000 | 100.34    | 5        | 0.330 | 121.85        | 0.609       | 0.121             |
