# Supplementary material for: Effects of shinbuto and ninjinto on prostaglandin E 2 production in lipopolysaccharide-treated human gingival fibroblasts
Source: PeerJ journal article supplement (doi:10.7717/peerj.4120), 2017-12-01
Supplement: raw_data_Fig1_2_3_6.zip [file raw_data_Fig1_2_3_6.zip]

- Exp. 23
- Condition
  - drug1: TJ-30-32 ()
  - experimental No. 1
  - treatment: 24h
- Measurement
  - PGE2
  - Date: 2016.6.18
- Cells
  - cells: HGFs (No. 4), passages: 17
  - cell numbers:  $1 \times 10^4$  cells/well =  $5 \times 10^4$  cells/ml

|   | conc.  | OD    |
|---|--------|-------|
| 1 | 7.8    | 1.070 |
| 2 | 15.6   | 0.943 |
| 3 | 31.2   | 0.879 |
| 4 | 62.5   | 0.755 |
| 5 | 125.0  | 0.529 |
| 6 | 250.0  | 0.362 |
| 7 | 500.0  | 0.292 |
| 8 | 1000.0 | 0.223 |

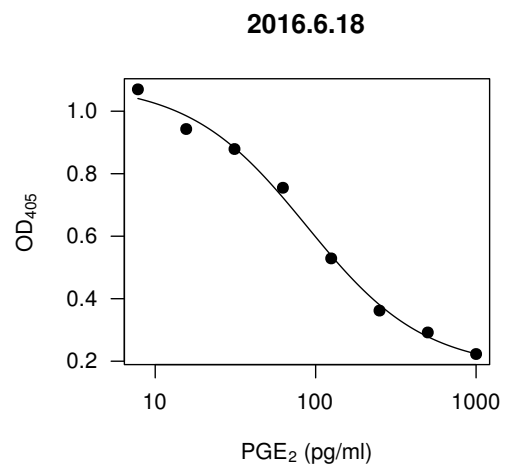

|   | drug1 | mean  | SD    |
|---|-------|-------|-------|
| 1 | 1     | 0.192 | 0.058 |
| 2 | 2     | 0.995 | 0.069 |
| 3 | 3     | 1.032 | 0.176 |
| 4 | 4     | 1.109 | 0.172 |

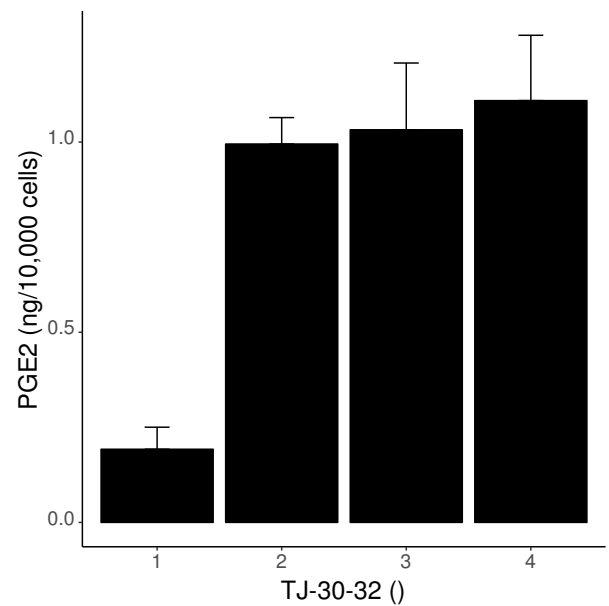

|    | drug1 | viability | dilution | OD    | conc. (pg/ml) | net (ng/ml) | (ng/10,000 cells) |
|----|-------|-----------|----------|-------|---------------|-------------|-------------------|
| 1  | 1     | 121.64    | 25       | 0.849 | 36.89         | 0.922       | 0.152             |
| 2  | 1     | 120.57    | 25       | 0.705 | 67.10         | 1.677       | 0.278             |
| 3  | 1     | 119.49    | 25       | 0.824 | 41.39         | 1.035       | 0.173             |
| 4  | 1     | 107.15    | 25       | 0.856 | 35.67         | 0.892       | 0.166             |
| 5  | 2     | 100.18    | 25       | 0.416 | 209.28        | 5.232       | 1.045             |
| 6  | 2     | 105.19    | 25       | 0.402 | 223.97        | 5.599       | 1.065             |
| 7  | 2     | 95.89     | 25       | 0.449 | 180.01        | 4.500       | 0.939             |
| 8  | 2     | 98.75     | 25       | 0.444 | 184.03        | 4.601       | 0.932             |
| 9  | 3     | 106.80    | 25       | 0.366 | 270.50        | 6.763       | 1.266             |
| 10 | 3     | 137.20    | 25       | 0.391 | 236.71        | 5.918       | 0.863             |
| 11 | 3     | 134.52    | 25       | 0.357 | 284.70        | 7.118       | 1.058             |
| 12 | 3     | 112.70    | 25       | 0.413 | 212.30        | 5.307       | 0.942             |
| 13 | 4     | 110.37    | 25       | 0.382 | 248.03        | 6.201       | 1.124             |
| 14 | 4     | 143.10    | 25       | 0.383 | 246.73        | 6.168       | 0.862             |
| 15 | 4     | 136.66    | 25       | 0.329 | 338.35        | 8.459       | 1.238             |
| 16 | 4     | 128.44    | 25       | 0.342 | 311.42        | 7.786       | 1.212             |
