# Supplementary material for: Effects of shinbuto and ninjinto on prostaglandin E 2 production in lipopolysaccharide-treated human gingival fibroblasts
Source: PeerJ journal article supplement (doi:10.7717/peerj.4120), 2017-12-01
Supplement: raw_data_Fig1_2_3_6.zip [file raw_data_Fig1_2_3_6.zip]

|    | drug  | LPS | dose   | mean   | sd   |
|----|-------|-----|--------|--------|------|
| 1  | TJ041 | 0   | 0.000  | 100.00 | 3.83 |
| 2  | TJ041 | 0   | 0.500  | 98.25  | 1.83 |
| 3  | TJ041 | 0   | 1.000  | 97.18  | 1.62 |
| 4  | TJ041 | 0   | 2.000  | 97.87  | 2.26 |
| 5  | TJ041 | 0   | 5.000  | 85.06  | 1.53 |
| 6  | TJ041 | 0   | 10.000 | 69.69  | 4.82 |
| 7  | TJ041 | 10  | 0.000  | 101.12 | 3.79 |
| 8  | TJ041 | 10  | 0.500  | 98.93  | 2.40 |
| 9  | TJ041 | 10  | 1.000  | 99.64  | 2.18 |
| 10 | TJ041 | 10  | 2.000  | 99.21  | 2.65 |
| 11 | TJ041 | 10  | 5.000  | 91.81  | 5.45 |
| 12 | TJ041 | 10  | 10.000 | 71.87  | 3.92 |

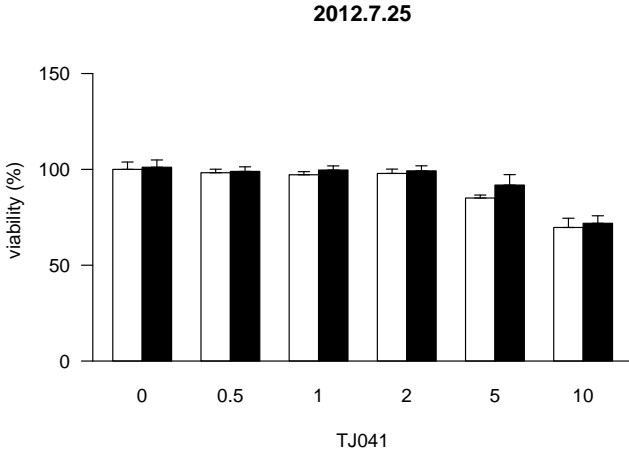

- cells: HGFs (No. 2)
- passages: 8
- cell numbers:  $0.5 \times 10^4$  cells/well
- LPS: PgLPS (10 ng/ml), treatment: 24h

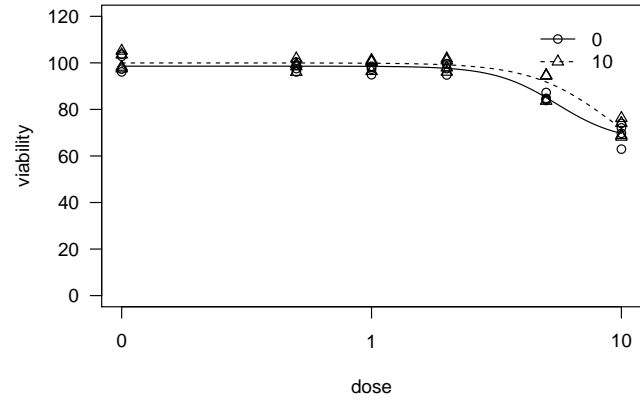

|       | Estimate | Std. Error | Lower  | Upper |
|-------|----------|------------|--------|-------|
| 0:50  | 5.52     | 1.34       | 2.81   | 8.23  |
| 10:50 | 9.12     | 12.65      | -16.44 | 34.68 |

|   | drug  | OD    | mean  |
|---|-------|-------|-------|
| 1 | blank | 0.094 | 0.086 |
| 2 | blank | 0.081 |       |
| 3 | blank | 0.086 |       |
| 4 | blank | 0.087 |       |
| 5 | blank | 0.088 |       |
| 6 | blank | 0.086 |       |
| 7 | blank | 0.094 |       |
| 8 | blank | 0.070 |       |

|    | drug  | LPS | dose   | OD    | viability |
|----|-------|-----|--------|-------|-----------|
| 1  | TJ041 | 0   | 0.000  | 0.959 | 97.3      |
| 2  | TJ041 | 0   | 0.000  | 1.013 | 102.8     |
| 3  | TJ041 | 0   | 0.000  | 0.947 | 96.1      |
| 4  | TJ041 | 0   | 0.000  | 1.022 | 103.7     |
| 5  | TJ041 | 0   | 0.500  | 0.989 | 100.4     |
| 6  | TJ041 | 0   | 0.500  | 0.961 | 97.5      |
| 7  | TJ041 | 0   | 0.500  | 0.947 | 96.1      |
| 8  | TJ041 | 0   | 0.500  | 0.975 | 99.0      |
| 9  | TJ041 | 0   | 1.000  | 0.958 | 97.2      |
| 10 | TJ041 | 0   | 1.000  | 0.935 | 94.9      |
| 11 | TJ041 | 0   | 1.000  | 0.971 | 98.6      |
| 12 | TJ041 | 0   | 1.000  | 0.966 | 98.0      |
| 13 | TJ041 | 0   | 2.000  | 0.980 | 99.5      |
| 14 | TJ041 | 0   | 2.000  | 0.961 | 97.5      |
| 15 | TJ041 | 0   | 2.000  | 0.982 | 99.7      |
| 16 | TJ041 | 0   | 2.000  | 0.934 | 94.8      |
| 17 | TJ041 | 0   | 5.000  | 0.835 | 84.8      |
| 18 | TJ041 | 0   | 5.000  | 0.826 | 83.8      |
| 19 | TJ041 | 0   | 5.000  | 0.831 | 84.3      |
| 20 | TJ041 | 0   | 5.000  | 0.860 | 87.3      |
| 21 | TJ041 | 0   | 10.000 | 0.710 | 72.1      |
| 22 | TJ041 | 0   | 10.000 | 0.687 | 69.7      |
| 23 | TJ041 | 0   | 10.000 | 0.729 | 74.0      |
| 24 | TJ041 | 0   | 10.000 | 0.620 | 62.9      |
| 25 | TJ041 | 10  | 0.000  | 0.961 | 97.5      |
| 26 | TJ041 | 10  | 0.000  | 0.968 | 98.2      |
| 27 | TJ041 | 10  | 0.000  | 1.020 | 103.5     |
| 28 | TJ041 | 10  | 0.000  | 1.036 | 105.1     |
| 29 | TJ041 | 10  | 0.500  | 0.970 | 98.5      |
| 30 | TJ041 | 10  | 0.500  | 0.946 | 96.0      |
| 31 | TJ041 | 10  | 0.500  | 0.980 | 99.5      |
| 32 | TJ041 | 10  | 0.500  | 1.003 | 101.8     |
| 33 | TJ041 | 10  | 1.000  | 0.950 | 96.4      |
| 34 | TJ041 | 10  | 1.000  | 0.991 | 100.6     |
| 35 | TJ041 | 10  | 1.000  | 0.997 | 101.2     |
| 36 | TJ041 | 10  | 1.000  | 0.989 | 100.4     |
| 37 | TJ041 | 10  | 2.000  | 0.947 | 96.1      |
| 38 | TJ041 | 10  | 2.000  | 0.965 | 97.9      |
| 39 | TJ041 | 10  | 2.000  | 1.003 | 101.8     |
| 40 | TJ041 | 10  | 2.000  | 0.995 | 101.0     |
| 41 | TJ041 | 10  | 5.000  | 0.930 | 94.4      |
| 42 | TJ041 | 10  | 5.000  | 0.824 | 83.6      |
| 43 | TJ041 | 10  | 5.000  | 0.932 | 94.6      |
| 44 | TJ041 | 10  | 5.000  | 0.932 | 94.6      |
| 45 | TJ041 | 10  | 10.000 | 0.679 | 68.9      |
| 46 | TJ041 | 10  | 10.000 | 0.730 | 74.1      |
| 47 | TJ041 | 10  | 10.000 | 0.751 | 76.2      |
| 48 | TJ041 | 10  | 10.000 | 0.672 | 68.2      |
