# Supplementary material for: Effects of shinbuto and ninjinto on prostaglandin E 2 production in lipopolysaccharide-treated human gingival fibroblasts
Source: PeerJ journal article supplement (doi:10.7717/peerj.4120), 2017-12-01
Supplement: raw_data_revised.zip [file raw_data_revised.zip]

- Exp. 25
- Condition
  - drug1: herb ()
  - experimental No. 2
  - treatment: 24h
- Measurement
  - IL-8
  - Date: 2017.10.20
- Cells
  - cells: HGFs (No. 1), passages: 13
  - cell numbers:  $0.667 \times 10^4$  cells/well =  $3.335 \times 10^4$  cells/ml

|   | conc.  | OD    | OD-blank |
|---|--------|-------|----------|
| 1 | 0.0    | 0.185 | 0.000    |
| 2 | 15.6   | 0.207 | 0.022    |
| 3 | 31.2   | 0.222 | 0.037    |
| 4 | 62.5   | 0.265 | 0.080    |
| 5 | 125.0  | 0.345 | 0.160    |
| 6 | 250.0  | 0.478 | 0.293    |
| 7 | 500.0  | 0.620 | 0.435    |
| 8 | 1000.0 | 0.782 | 0.597    |

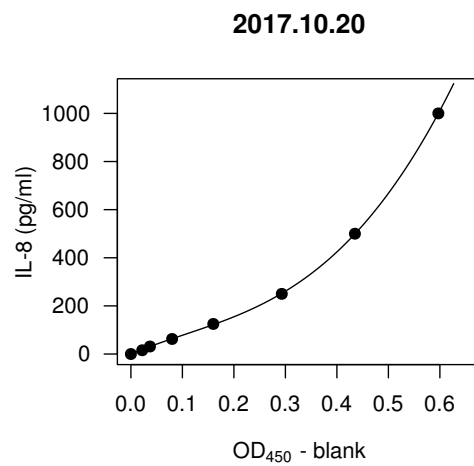

|    | drug1 | mean  | SD    |
|----|-------|-------|-------|
| 1  | 1     | 0.041 | 0.037 |
| 2  | 2     | 3.587 | 0.304 |
| 3  | 3     | 6.652 | 0.855 |
| 4  | 4     | 2.665 | 0.053 |
| 5  | 5     | 3.497 | 0.232 |
| 6  | 6     | 4.526 | 0.604 |
| 7  | 7     | 3.099 | 0.224 |
| 8  | 8     | 5.322 | 0.792 |
| 9  | 9     | 3.217 | 0.097 |
| 10 | 10    | 3.549 | 0.167 |

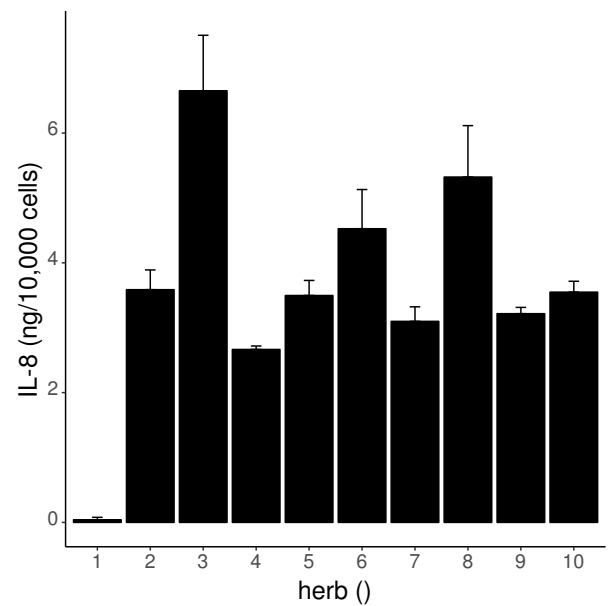

|    | drug1 | viability | dilution | OD    | conc. (pg/ml) | net (ng/ml) | (ng/10,000 cells) |
|----|-------|-----------|----------|-------|---------------|-------------|-------------------|
| 1  | 1     | 95.83     | 50       | 0.191 | 5.32          | 0.266       | 0.083             |
| 2  | 1     | 105.74    | 50       | 0.186 | 0.89          | 0.045       | 0.013             |
| 3  | 1     | 98.43     | 50       | 0.187 | 1.79          | 0.089       | 0.027             |
| 4  | 2     | 109.15    | 50       | 0.476 | 249.51        | 12.476      | 3.427             |
| 5  | 2     | 111.27    | 50       | 0.478 | 252.03        | 12.602      | 3.396             |
| 6  | 2     | 111.43    | 50       | 0.508 | 292.61        | 14.630      | 3.937             |
| 7  | 3     | 105.25    | 50       | 0.606 | 467.96        | 23.398      | 6.666             |
| 8  | 3     | 106.88    | 50       | 0.635 | 534.61        | 26.731      | 7.499             |
| 9  | 3     | 103.79    | 50       | 0.573 | 400.80        | 20.040      | 5.790             |
| 10 | 4     | 110.94    | 50       | 0.426 | 193.07        | 9.654       | 2.609             |
| 11 | 4     | 111.75    | 50       | 0.432 | 199.23        | 9.962       | 2.673             |
| 12 | 4     | 109.48    | 50       | 0.431 | 198.20        | 9.910       | 2.714             |
| 13 | 5     | 107.85    | 50       | 0.472 | 244.53        | 12.227      | 3.399             |
| 14 | 5     | 108.99    | 50       | 0.470 | 242.08        | 12.104      | 3.330             |
| 15 | 5     | 110.45    | 50       | 0.497 | 277.11        | 13.855      | 3.761             |
| 16 | 6     | 81.69     | 50       | 0.500 | 281.26        | 14.063      | 5.162             |
| 17 | 6     | 102.82    | 50       | 0.493 | 271.66        | 13.583      | 3.961             |
| 18 | 6     | 103.95    | 50       | 0.519 | 308.87        | 15.444      | 4.455             |
| 19 | 7     | 110.29    | 50       | 0.454 | 223.19        | 11.159      | 3.034             |
| 20 | 7     | 111.75    | 50       | 0.476 | 249.51        | 12.476      | 3.347             |
| 21 | 7     | 111.92    | 50       | 0.449 | 217.54        | 10.877      | 2.914             |
| 22 | 8     | 110.29    | 50       | 0.556 | 369.57        | 18.479      | 5.024             |
| 23 | 8     | 111.27    | 50       | 0.545 | 350.52        | 17.526      | 4.723             |
| 24 | 8     | 108.67    | 50       | 0.598 | 450.85        | 22.543      | 6.220             |
| 25 | 9     | 113.70    | 50       | 0.478 | 252.03        | 12.602      | 3.323             |
| 26 | 9     | 113.70    | 50       | 0.470 | 242.08        | 12.104      | 3.192             |
| 27 | 9     | 112.89    | 50       | 0.465 | 236.03        | 11.802      | 3.135             |
| 28 | 10    | 108.02    | 50       | 0.470 | 242.08        | 12.104      | 3.360             |
| 29 | 10    | 104.77    | 50       | 0.482 | 257.14        | 12.857      | 3.680             |
| 30 | 10    | 111.27    | 50       | 0.490 | 267.63        | 13.381      | 3.606             |
