# Supplementary material for: Effects of shinbuto and ninjinto on prostaglandin E 2 production in lipopolysaccharide-treated human gingival fibroblasts
Source: PeerJ journal article supplement (doi:10.7717/peerj.4120), 2017-12-01
Supplement: raw_data_revised.zip [file raw_data_revised.zip]

- Exp. 25
- Condition
  - drug1: herb ()
  - experimental No. 2
  - treatment: 24h
- Measurement
  - IL-6
  - Date: 2017.10.23
- Cells
  - cells: HGFs (No. 1), passages: 13
  - cell numbers:  $0.667 \times 10^4$  cells/well =  $3.335 \times 10^4$  cells/ml

|   | conc.  | OD    | OD-blank |
|---|--------|-------|----------|
| 1 | 0.0    | 0.077 | 0.000    |
| 2 | 31.2   | 0.095 | 0.018    |
| 3 | 62.5   | 0.103 | 0.026    |
| 4 | 125.0  | 0.144 | 0.067    |
| 5 | 250.0  | 0.209 | 0.132    |
| 6 | 500.0  | 0.347 | 0.270    |
| 7 | 1000.0 | 0.588 | 0.511    |

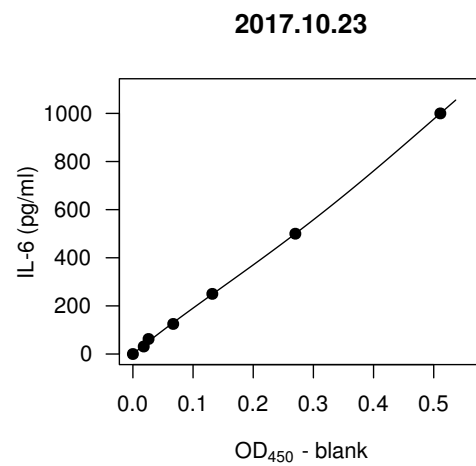

|    | drug1 | mean  | SD    |
|----|-------|-------|-------|
| 1  | 1     | 0.037 | 0.023 |
| 2  | 2     | 2.701 | 0.112 |
| 3  | 3     | 4.688 | 0.738 |
| 4  | 4     | 2.461 | 0.133 |
| 5  | 5     | 2.661 | 0.187 |
| 6  | 6     | 2.134 | 0.180 |
| 7  | 7     | 2.401 | 0.070 |
| 8  | 8     | 2.676 | 0.329 |
| 9  | 9     | 1.956 | 0.151 |
| 10 | 10    | 2.528 | 0.142 |

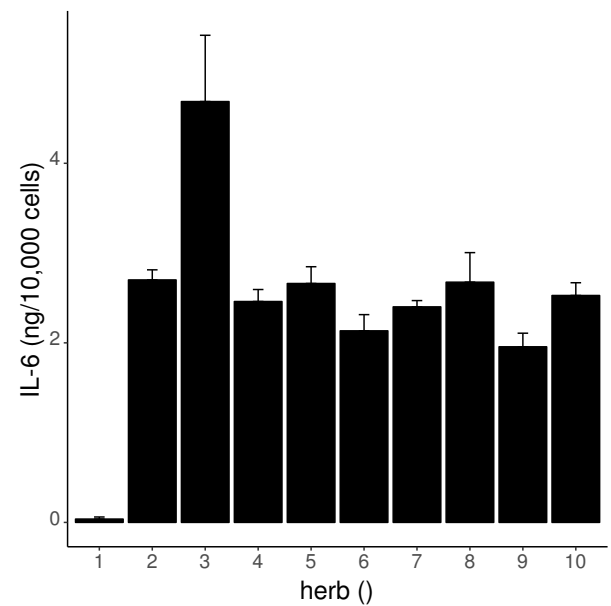

|    | drug1 | viability | dilution | OD    | conc. (pg/ml) | net (ng/ml) | (ng/10,000 cells) |
|----|-------|-----------|----------|-------|---------------|-------------|-------------------|
| 1  | 1     | 95.83     | 20       | 0.082 | 10.22         | 0.204       | 0.064             |
| 2  | 1     | 105.74    | 20       | 0.079 | 4.10          | 0.082       | 0.023             |
| 3  | 1     | 98.43     | 20       | 0.079 | 4.10          | 0.082       | 0.025             |
| 4  | 2     | 109.15    | 20       | 0.331 | 469.96        | 9.399       | 2.582             |
| 5  | 2     | 111.27    | 20       | 0.349 | 503.98        | 10.080      | 2.716             |
| 6  | 2     | 111.43    | 20       | 0.358 | 521.17        | 10.423      | 2.805             |
| 7  | 3     | 105.25    | 20       | 0.560 | 939.11        | 18.782      | 5.351             |
| 8  | 3     | 106.88    | 20       | 0.523 | 858.95        | 17.179      | 4.820             |
| 9  | 3     | 103.79    | 20       | 0.435 | 673.68        | 13.474      | 3.893             |
| 10 | 4     | 110.94    | 20       | 0.328 | 464.33        | 9.287       | 2.510             |
| 11 | 4     | 111.75    | 20       | 0.335 | 477.47        | 9.549       | 2.562             |
| 12 | 4     | 109.48    | 20       | 0.305 | 421.62        | 8.432       | 2.309             |
| 13 | 5     | 107.85    | 20       | 0.355 | 515.42        | 10.308      | 2.866             |
| 14 | 5     | 108.99    | 20       | 0.334 | 475.59        | 9.512       | 2.617             |
| 15 | 5     | 110.45    | 20       | 0.326 | 460.59        | 9.212       | 2.501             |
| 16 | 6     | 81.69     | 20       | 0.228 | 282.34        | 5.647       | 2.073             |
| 17 | 6     | 102.82    | 20       | 0.261 | 341.54        | 6.831       | 1.992             |
| 18 | 6     | 103.95    | 20       | 0.296 | 405.08        | 8.102       | 2.337             |
| 19 | 7     | 110.29    | 20       | 0.314 | 438.25        | 8.765       | 2.383             |
| 20 | 7     | 111.75    | 20       | 0.313 | 436.40        | 8.728       | 2.342             |
| 21 | 7     | 111.92    | 20       | 0.327 | 462.46        | 9.249       | 2.478             |
| 22 | 8     | 110.29    | 20       | 0.379 | 561.79        | 11.236      | 3.055             |
| 23 | 8     | 111.27    | 20       | 0.324 | 456.85        | 9.137       | 2.462             |
| 24 | 8     | 108.67    | 20       | 0.323 | 454.99        | 9.100       | 2.511             |
| 25 | 9     | 113.70    | 20       | 0.276 | 368.64        | 7.373       | 1.944             |
| 26 | 9     | 113.70    | 20       | 0.262 | 343.34        | 6.867       | 1.811             |
| 27 | 9     | 112.89    | 20       | 0.292 | 397.76        | 7.955       | 2.113             |
| 28 | 10    | 108.02    | 20       | 0.324 | 456.85        | 9.137       | 2.536             |
| 29 | 10    | 104.77    | 20       | 0.302 | 416.09        | 8.322       | 2.382             |
| 30 | 10    | 111.27    | 20       | 0.344 | 494.48        | 9.890       | 2.665             |
